## Inositol lipid synthesis is widespread in host-associated Bacteroidetes

S. L. Heaver<sup>1</sup>, H. H. Le<sup>2</sup>, P. Tang<sup>3</sup>, A. Baslé<sup>4</sup>, J. Marles-Wright<sup>5</sup>, E. L. Johnson<sup>2</sup>, D. J.

Campopiano<sup>3</sup>, R. E. Ley<sup>1</sup>

<sup>1</sup> Department of Microbiome Science, Max Planck Institute for Developmental Biology, Tübingen  
72076, Germany

<sup>2</sup> Division of Nutritional Sciences, Cornell University, Ithaca, NY 14853, USA

<sup>3</sup> School of Chemistry, University of Edinburgh, Edinburgh, Scotland, UK

<sup>4</sup> Newcastle University Biosciences Institute, Newcastle University, UK

<sup>5</sup> School of Natural and Environmental Sciences, Newcastle University, UK

### **Abstract**

Ubiquitous in eukaryotes, inositol lipids have finely tuned roles in cellular signaling and membrane homeostasis. In Bacteria, however, inositol lipid production is rare. Recently, the prominent human gut bacterium *Bacteroides thetaiotaomicron* (BT) was reported to produce inositol lipids, including inositol sphingolipids, but the pathways remain ambiguous and their prevalence unclear. Here, we investigated the gene cluster responsible for inositol lipid synthesis in BT using a novel strain with inducible control of sphingolipid synthesis. We characterized the biosynthetic pathway from *myo*-inositol-phosphate (MIP) synthesis to phosphoinositol-dihydroceramide, including structural and kinetic studies of the enzyme MIP synthase (MIPS). We determined the crystal structure of recombinant BT MIPS with bound NAD cofactor at 2.0 Å resolution, and identified the first reported phosphatase for the conversion of bacterially-derived phosphatidylinositol phosphate (PIP) to phosphatidylinositol (PI). Transcriptomic analysis indicated inositol production is nonessential but its loss alters BT capsule expression. Bioinformatic and lipidomic comparisons of Bacteroidetes species revealed a novel second putative pathway for bacterial PI synthesis without a PIP intermediate. Our results indicate that inositol sphingolipid production, via one of the two

pathways, is widespread in host-associated Bacteroidetes, and may be implicated in host interactions both indirectly via the capsule and directly through inositol lipid provisioning.

## 1 **Introduction**

2           Inositol, a carbocyclic sugar abundant in eukaryotes, forms the structural basis for diverse  
3 phosphorylated secondary messenger inositol phosphates and inositol lipids. At their simplest,  
4 inositol lipids have inositol as their polar headgroup, as is the case with phosphatidylinositol (PI; on a  
5 glycerophospholipid backbone) or inositol phosphorylceramide (on a sphingolipid backbone; Fig. 1A).  
6 The inositol headgroup can be subject to further modifications, including the phosphorylation of PI at  
7 multiple sites to form bioactive phosphoinositides, or the addition of a mannose on inositol  
8 sphingolipids to form the mannosylinositol phosphorylceramides (MIPCs) abundant in yeast <sup>1,2</sup>.  
9 Inositol derivatives control key processes of eukaryotic cell physiology. For instance, although  
10 phosphoinositides constitute a small fraction of overall phospholipids, they are ubiquitous and  
11 essential in roles such as marking organelle identity, regulating cytoskeleton-membrane interactions,  
12 and controlling cell division and autophagy <sup>3,4</sup>.

13           Despite the widespread distribution of inositol lipids in eukaryotes, relatively little is known  
14 about the structure and distribution of inositol lipids in Bacteria. Bacterial inositol lipids are  
15 comparatively rare across bacterial species, with production previously thought to be limited largely  
16 to phosphatidylinositol (PI) synthesis in members of the phylum Actinobacteria (*e.g.*, *Mycobacteria*,  
17 *Corynebacteria*, and *Streptomyces*) <sup>5-7</sup> and Spirochaetes (*Treponema*) <sup>8</sup>. In *Mycobacterium*  
18 *tuberculosis*, an obligate intracellular human pathogen, the inositol headgroups of PI are the outer  
19 membrane molecules to which surface oligosaccharide virulence factors are linked <sup>9</sup>.

20           In eukaryotes, both sphingolipids (SLs, lipids with a sphingosine, or long-chain base  
21 backbone) and inositol lipids are involved in the regulation of cell fate and differentiation,  
22 inflammation, protein trafficking, and gene regulation in central metabolic pathways, with  
23 imbalances linked with the pathologies of a growing inventory of diseases <sup>4,10-12</sup>. These two lipid  
24 types intersect in the inositol sphingolipids, such as the glycosylinositol phosphorylceramides  
25 abundant in yeast and plants. Inositol SLs are known to be produced by the periodontal pathogen  
26 *Tannerella forsythia* <sup>13</sup>, a member of the Bacteroidetes. Furthermore, Brown *et al.* recently reported

27 inositol SLs in the common human gut commensal *Bacteroides thetaiotaomicron*<sup>14</sup>. Ceramide  
28 phosphoryl-*myo*-inositol has been reported in *Sphingobacterium spiritivorum*<sup>15</sup>, a free-living member  
29 of the Bacteroidetes, and more recently in *Myxococcus xanthus*<sup>16</sup>, of the Proteobacteria phylum. In  
30 contrast to the well-studied inositol lipids, including inositol SLs, in plants and fungi, bacterial inositol  
31 sphingolipid synthesis has been largely overlooked.

32  
33         The discovery of inositol lipids in a several more species suggests that these lipids may be  
34 more widespread in bacteria than previously thought and may use novel pathways. Across kingdoms,  
35 *de novo* inositol synthesis begins with the formation of inositol phosphate from glucose 6-phosphate  
36 (G6P) by a *myo*-inositol phosphate synthase (MIPS, EC 5.5.1.4)<sup>11</sup>. From here, a bacterial pathway for  
37 inositol glycerophospholipid synthesis is mostly known (*e.g.*, in *Mycobacteria*), and differs from the  
38 eukaryotic pathway by the direct use of inositol-phosphate, not its dephosphorylated inositol form,  
39 as a substrate in the formation of PI. This leads first to the synthesis of phosphatidylinositol-  
40 phosphate (PIP) from CDP-diacylglycerol (CDP-DAG) and MIP, which is subsequently  
41 dephosphorylated to PI<sup>17</sup>. Though the PIP synthase has been well characterized in bacteria<sup>18</sup>, the  
42 phosphatase responsible for the conversion of bacterial PIP to PI has not yet been identified<sup>18</sup>. In  
43 addition, though the gene cluster for bacterial inositol SL synthesis has been predicted in *B.*  
44 *thetaiotaomicron* (hereafter BT)<sup>14</sup>, the functions of these enzymes remain to be confirmed.

45         Here, we combine genomic and biochemical approaches to functionally characterize the  
46 predicted inositol lipid metabolism gene cluster in BT from the initial synthesis of *myo*-inositol-  
47 phosphate (MIP) to its addition as a headgroup to glycerophospholipids and SLs. Together with the  
48 description of a novel putative alternative gene cluster, common in the *Prevotella*, this work  
49 broadens the understanding of how gut bacteria synthesize complex lipids, and reveals an extensive  
50 capacity for inositol lipid synthesis among gut-associated Bacteroidetes.

51

52

53

## 54 Results and Discussion

55 We first identified genes responsible for inositol lipid metabolism in BT (Fig. 1A). We  
 56 identified BT\_1522 by NCBI Blast-P as having high homology to the yeast enzyme inositol  
 57 phosphorylceramide synthase (IPC synthase, also known as AUR1) that catalyzes the attachment of  
 58 the phosphorylinositol group onto ceramide (query cover 50%, e-value 1e-15, percent identity 26%).  
 59 This led us to hypothesize that this enzyme is responsible for phosphoinositol SL synthesis in BT,  
 60 though BT SLs have predominantly dihydroceramide (not ceramide) backbones, leading instead to  
 61 the synthesis of phosphoinositol dihydroceramide (PI-DHC). *BT\_1522* and its gene cluster (Fig. 1B)  
 62 were previously predicted to be involved in inositol lipid metabolism<sup>14</sup>. Adjacent predicted genes in  
 63 the cluster include *BT\_1523* (annotated as a CDP-diacylglycerol-inositol 3-phosphatidyltransferase),  
 64 *BT\_1524* (hypothetical protein), *BT\_1525* (currently annotated as phosphatidylglycerophosphatase A,  
 65 PgpA), and *BT\_1526* (*myo*-inositol phosphate synthase, “MIPS”).

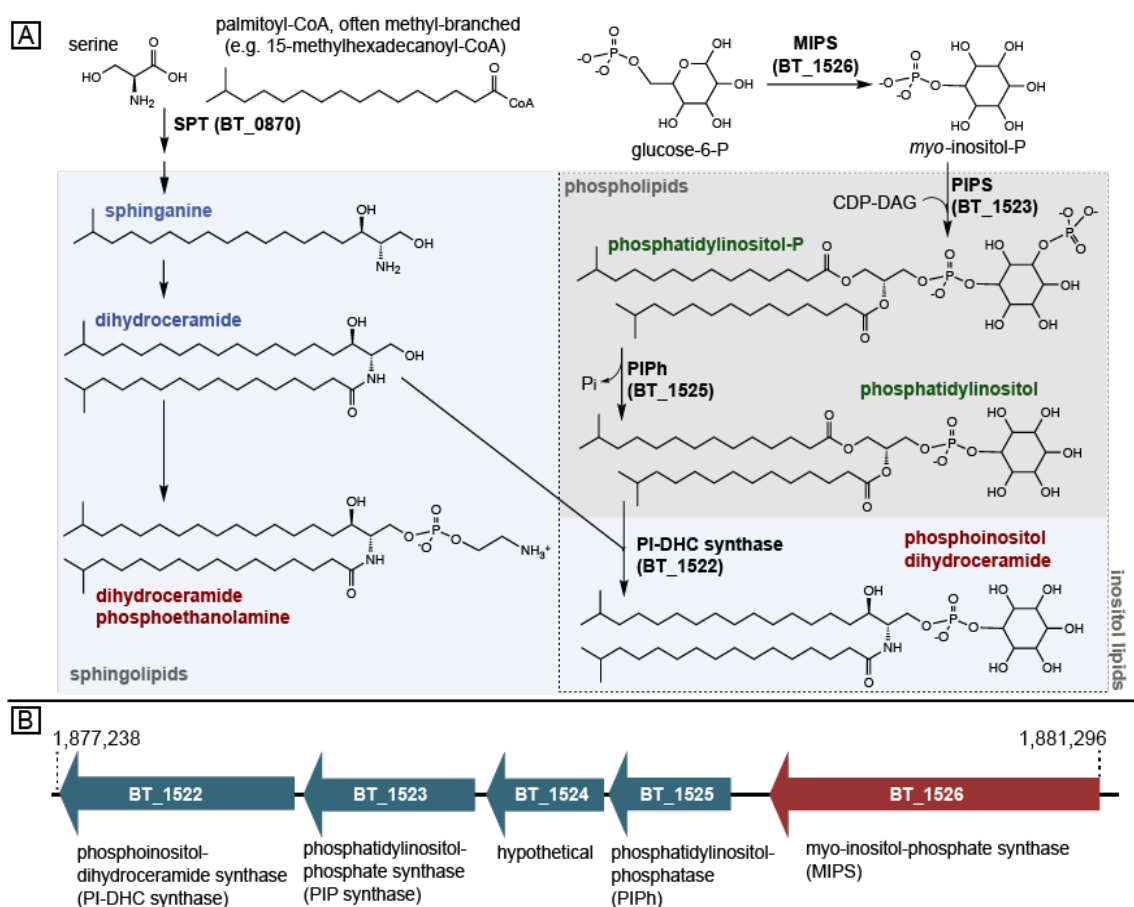

67 **Figure 1. Enzymatic pathway for inositol lipid synthesis in BT.** (A) The *de novo* sphingolipid synthesis  
 68 metabolic pathway in relation to inositol lipid synthesis, with BT enzymes investigated in this study  
 69 (bolded black) and representative lipid structures. Sphingolipid structures are on a light blue  
 70 background; phospholipid structures are on a gray background. (B) The genomic region of BT inositol  
 71 and inositol lipid synthesis. Gene color (blue or red) indicates membership in an operon predicted by  
 72 BioCyc. Annotations are of the enzyme functions elucidated in this study (due to the lack of a lipid  
 73 phenotype in its knockout strain, BT\_1524 was not investigated further and remains hypothetical).  
 74

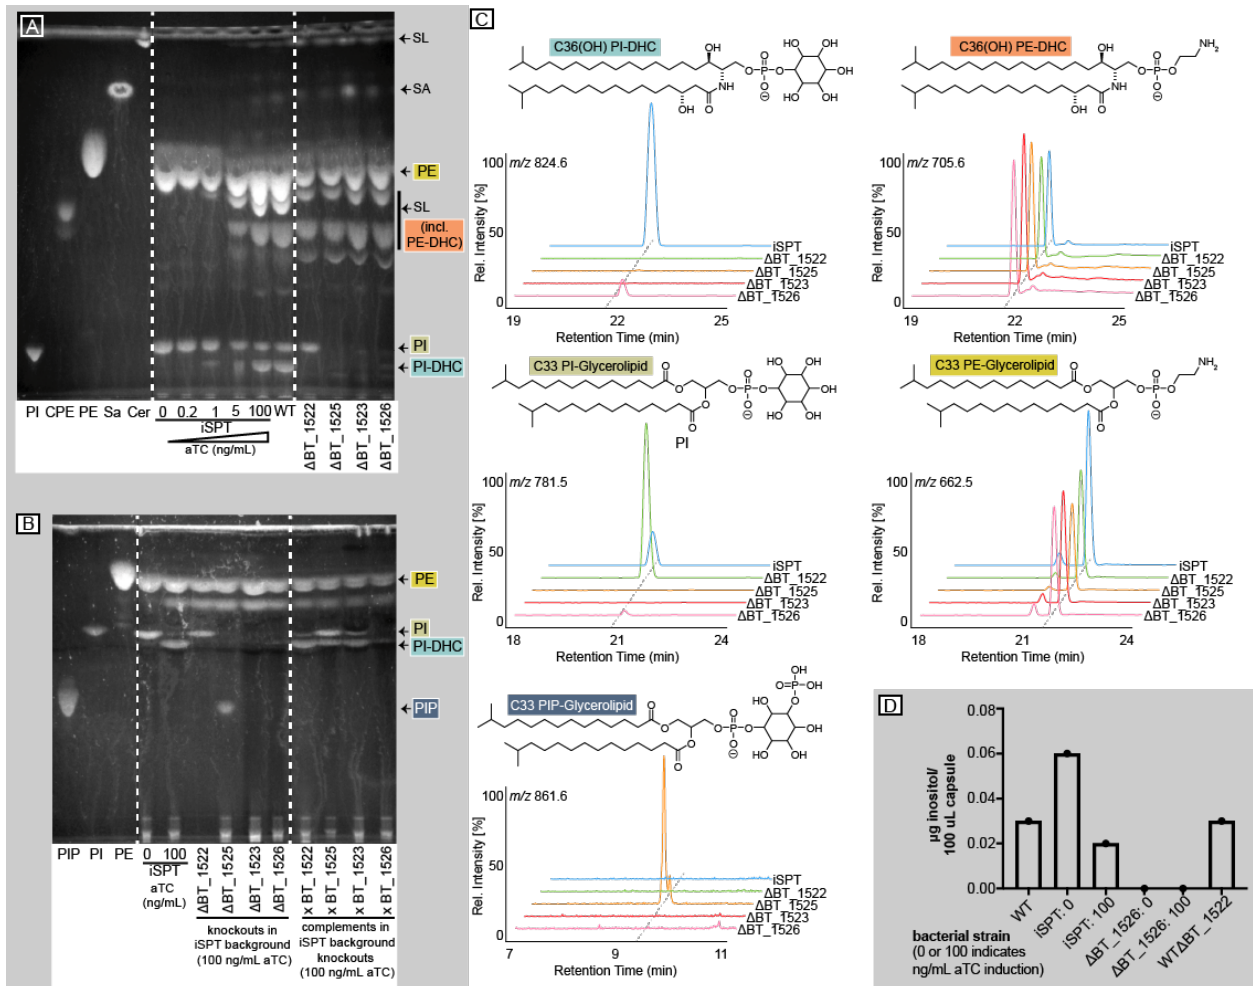

91 with or without sphingolipids (iSPT 100 vs. 0 ng/mL aTC induction), PI-DHC synthase (WT $\Delta$ BT\_1522),  
92 and MIPS ( $\Delta$ BT\_1526, at 0 and 100 ng/mL aTC induction).  
93

94 We next constructed a BT strain with tunable SL synthesis. As inositol lipids in BT include  
95 both glycerophospholipids (PI) and SLs (PI-DHC), we created a strain of BT with inducible control of  
96 the first enzyme in the *de novo* SL synthesis pathway, serine palmitoyltransferase (SPT; BT\_0870; Fig.  
97 1)<sup>19</sup>. This inducible-SPT (“iSPT”) strain enables precise control over BT synthesis to produce both PI  
98 and PI-DHC, or solely PI. As expected, in the absence of SPT, we detected no SLs by thin-layer  
99 chromatography (TLC) analysis (Fig. 2A). However, in iSPT, SL synthesis gradually increased with  
100 increasing levels of the anhydrotetracycline (aTC) inducer, to an approximate wild-type (WT) SL  
101 abundance with 100 ng/mL aTC induction (Fig. 2A). At full induction, SLs composed roughly half of  
102 the extracted lipids measured by TLC densitometry ( $47\pm 7\%$ , n=6). These SLs include PI-DHC and  
103 phosphoethanolamine dihydroceramide (PE-DHC), among others (Fig. 2C).

104 To uncover the function of each predicted enzyme in the putative inositol lipid metabolism  
105 pathway, we knocked out the individual genes (BT\_1522 to BT\_1526) in the iSPT background by  
106 scarless deletion<sup>20</sup> (denoted  $\Delta$ BT\_1522 to  $\Delta$ BT\_1526). BT\_1522 was also knocked out in the WT  
107 background (indicated by WT $\Delta$ BT\_1522). We examined the lipid content of the resulting knockout  
108 strains (with SL synthesis fully induced) using TLC and HPLC-MS. Consistent with the predicted role  
109 for BT\_1522 as a PI-DHC synthase, the  $\Delta$ BT\_1522 strain failed to produce PI-DHC, but production of  
110 PI and non-inositol SLs, including PE-DHC, was unaltered (Fig. 2A-C). Similarly, the  $\Delta$ BT\_1526 strain  
111 (lacking the predicted MIPS) failed to produce both PI and PI-DHC, in accordance with the loss of the  
112 *myo*-inositol-phosphate substrate.

113 Interestingly, both the  $\Delta$ BT\_1523 and  $\Delta$ BT\_1525 strains also failed to produce both PI and PI-  
114 DHC (Fig. 2A). As the synthesis of other glycerophospholipids did not appear to be affected in the  
115  $\Delta$ BT\_1525 strain, this observation was not in agreement with the annotated function of BT\_1525 as a  
116 PgpA<sup>21</sup>. We hypothesized that BT may use a two-step process to synthesize PI similar to that found  
117 in *Mycobacteria*, which uses a PIP intermediate<sup>18</sup>. In accord, comparison of the functional protein

118 motifs in BT\_1523 and BT\_1525 with those in the characterized *Renobacterium salmoninarum* PIP  
119 synthase (PIPS)<sup>22</sup> revealed the same conserved catalytic residues (DX<sub>2</sub>DGX<sub>2</sub>AR...GX<sub>3</sub>DX<sub>3</sub>D) in BT\_1523.  
120 This observation supports the notion that BT\_1523 functions as a PIPS in the biosynthesis of PIP.

121 To our knowledge, PIP has not been reported in BT. This is likely due, in part, because PIP  
122 extractions under non-acidic conditions may be low yielding. Also, PIP abundance may be inherently  
123 low in BT, similar to low phosphoinositide abundances in eukaryotes<sup>3</sup>. Following a PIP-optimized  
124 lipid extraction of BT and the knockout strains, we detected high levels of PIP in  $\Delta$ BT\_1525,  
125 detectable by both TLC and HPLC-MS (Fig. 2B-C). PIP accumulation in  $\Delta$ BT\_1525 suggests BT\_1525 is  
126 most likely a phosphatidylinositolphosphatase (PIPh), responsible for the rapid downstream  
127 conversion of PIP to PI. Though BT\_1525 has homology to the phosphatidylglycerophosphatase A  
128 protein family (Pfam), this sequence similarity could reflect an expansion of the functional role of this  
129 protein motif from the dephosphorylation of a phospholipid glycerophosphate headgroup to an  
130 inositolphosphate headgroup. Previous work has shown that transcriptomic expression of *BT\_1525* is  
131 higher than *BT\_1523* and *BT\_1522* in every growth phase of BT<sup>23</sup>, likely enabling the rapid  
132 conversion of PIP to PI and preventing accumulation of PIP in BT.

133 Despite the central location of *BT\_1524* in the inositol lipid metabolism gene cluster, inositol  
134 lipids in  $\Delta$ BT\_1524 phenocopied BT by TLC. The *BT\_1524* gene is predicted to encode an integral  
135 membrane protein with a Gtr-A motif (Pfam); other Gtr-A family proteins are involved in cell surface  
136 polysaccharide or exopolysaccharide synthesis<sup>24-26</sup>, suggesting *BT\_1524* may be involved in the  
137 membrane transfer of an inositol-linked lipid. Due to a lack of a detectable lipid phenotype in this  
138 mutant, we did not investigate it further.

139 To confirm that the loss of inositol lipids in knockout strains was not due to off-target effects,  
140 the native BT sequence of each gene was integrated genomically into knockout strains in the iSPT  
141 background ( $\Delta$ BT\_1522,  $\Delta$ BT\_1523,  $\Delta$ BT\_1525,  $\Delta$ BT\_1526), paired with a constitutive promoter  
142 optimized for BT<sup>27</sup>. The complementation was successful for three of the four strains ( $\Delta$ BT\_1522,  
143  $\Delta$ BT\_1523, and  $\Delta$ BT\_1525), fully restoring the capacity for both PI and PI-DHC synthesis (Fig. 2B).



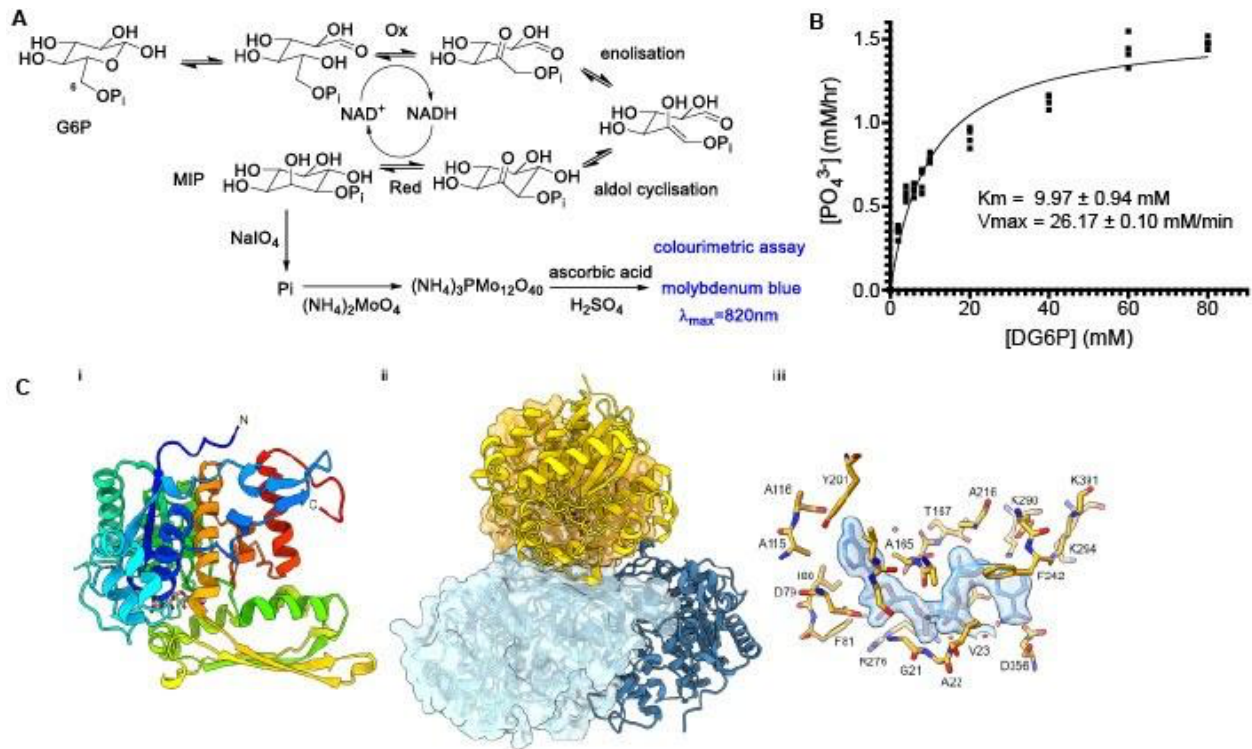

144 **Figure 3. BT\_1526 produces *myo*-inositol-phosphate *in vitro*.** (A) Proposed mechanism for the MIPS-  
 145 catalyzed NAD-dependent/redox-neutral conversion of G6P to MIP. (B) Molybdenum blue assay for  
 146 detection of MIP. Kinetic analysis of recombinant BT\_1526 MIPS using G6P as substrate. (C) The  
 147 crystal structure of BT\_1526 MIPS: (i) The monomer subunit, (ii) the tetramer, (iii) the structure of  
 148 the MIPS:NAD complex.  
 149  
 150

151 To confirm the predicted function of BT\_1526 as a redox-neutral, NAD<sup>+</sup>/NADH-dependent  
 152 MIPS, we cloned the gene and heterologously overexpressed the protein in *E. coli* (Fig. 3 and  
 153 Supporting Information). The N-terminally His-tagged BT\_1526 expressed well in a highly soluble  
 154 form (~50 kDa in size, observed by SDS-PAGE and confirmed by electrospray ionization mass  
 155 spectrometry, see SI), and was purified to homogeneity by standard immobilized metal affinity  
 156 chromatography methods. The MIPS activity of BT\_1526 was confirmed using a colorimetric  
 157 endpoint assay which monitors the appearance of the inorganic phosphate released from the MIP  
 158 product and not the G6P substrate<sup>28</sup> (Fig. 3A). Kinetic analysis of BT\_1526 MIPS operating on G6P are  
 159 as follows:  $K_m = 9.97 \pm 0.94\text{ mM}$ ,  $V_{\text{max}} = 26.17 \pm 0.10\text{ }\mu\text{M/min}$ , specific activity =  $0.513\text{ }\mu\text{mol/min/mg}$   
 160 (Fig. 3B). This activity is in the range of the published specific activities of MIPS from *S. cerevisiae*  
 161 ( $0.41\text{ }\mu\text{mol/min/mg}$ )<sup>29,30</sup>, *Synechocystis* sp. ( $0.02\text{ }\mu\text{mol/min/mg}$ )<sup>29</sup>, *A. fulgidus* ( $11.8\text{ }\mu\text{mol/min/mg}$ )<sup>31</sup>,  
 162 and *A. thaliana* ( $\sim 0.1\text{ }\mu\text{mol/min/mg}$ )<sup>32</sup>.

163           We further characterized the BT\_1526 protein by determining the X-ray crystal structure to  
164 2.0 Å resolution by molecular replacement using a model derived from the *Archaeoglobus fulgidus*  
165 MIPS structure (PDBID: 3QVT) (refinement statistics in Supplementary Table 1). The overall 3D fold of  
166 BT\_1526 is consistent with other members of this family with a Rossman fold-like nucleotide binding  
167 domain (residues 4-244, 355-429) with an intercalated catalytic/dimerization domain (residues 245-  
168 354)<sup>33-36</sup>. The protein adopts a tetrameric dimer of dimers quaternary structure of approximately  
169 188 kDa, with the dimerization domain forming an extended beta-sheet between monomers to  
170 create a saddle-like interface for the two dimers within the tetramer. Though the protein was  
171 purified without the addition of any cofactors or substrates, strong electron density consistent with  
172 the NAD<sup>+</sup> cofactor was observed in the initial maps calculated after molecular replacement and the  
173 final structure contains an NAD<sup>+</sup> molecule associated with each chain modelled at unit occupancy.  
174 Given the redox neutrality of the MIPS enzyme (*i.e.*, it catalyzes substrate oxidation, then reduction)  
175 there is a clear benefit to the retention of the NAD<sup>+</sup> in the active site for the lifetime of the protein, in  
176 agreement with NAD<sup>+</sup> retention in MIPS from other species<sup>37</sup>. The catalytic active site region of the  
177 protein is well conserved among members of the MIPS family for which a structure has been  
178 determined, with a cluster of lysine and aspartic acid residues responsible for binding and orienting  
179 the G6P substrate for isomerization to the MIP product, highlighting the importance of these  
180 residues for the correct activity of the enzyme. Outside of the highly conserved ligand binding site,  
181 the overall fold and quaternary structure of the representatives of the family in the PDB is highly  
182 conserved, although eukaryotic MIPS proteins have an N-terminal extension which appears to  
183 further stabilize the quaternary structure of the protein (Supp. Fig. 4-5). Overall, the enzyme  
184 described here as the first MIPS representative in the Bacteroidetes retains the key functional  
185 elements of other MIPS enzymes, underscoring its conservation across biological kingdoms.

186           To determine the role of MIPS in BT, we compared gene transcription of the ΔBT\_1526 strain  
187 to its iSPT strain at full SPT induction. Lacking MIPS, ΔBT\_1526 cells lack not only inositol lipids  
188 (PIP/PI/PI-DHC), but also any other molecules for which inositol may be used as a substrate, such as

189 cell surface polysaccharides. Only 29 genes were differentially expressed with greater than 1.5  
 190 absolute  $\log_2$ -fold-change in the  $\Delta$ BT\_1526 strain compared to the background iSPT strain at 100  
 191 ng/mL induction of SPT. These genes were almost entirely involved in capsule biosynthesis (Table S3).  
 192 Expression of CPS loci was fairly uniform across varied levels of SPT induction in the iSPT strain, while  
 193 the  $\Delta$ BT\_1526 strain had notable upregulation of capsular polysaccharide synthesis loci 1 and 6 (CPS1  
 194 and CPS6) (Fig. 4).

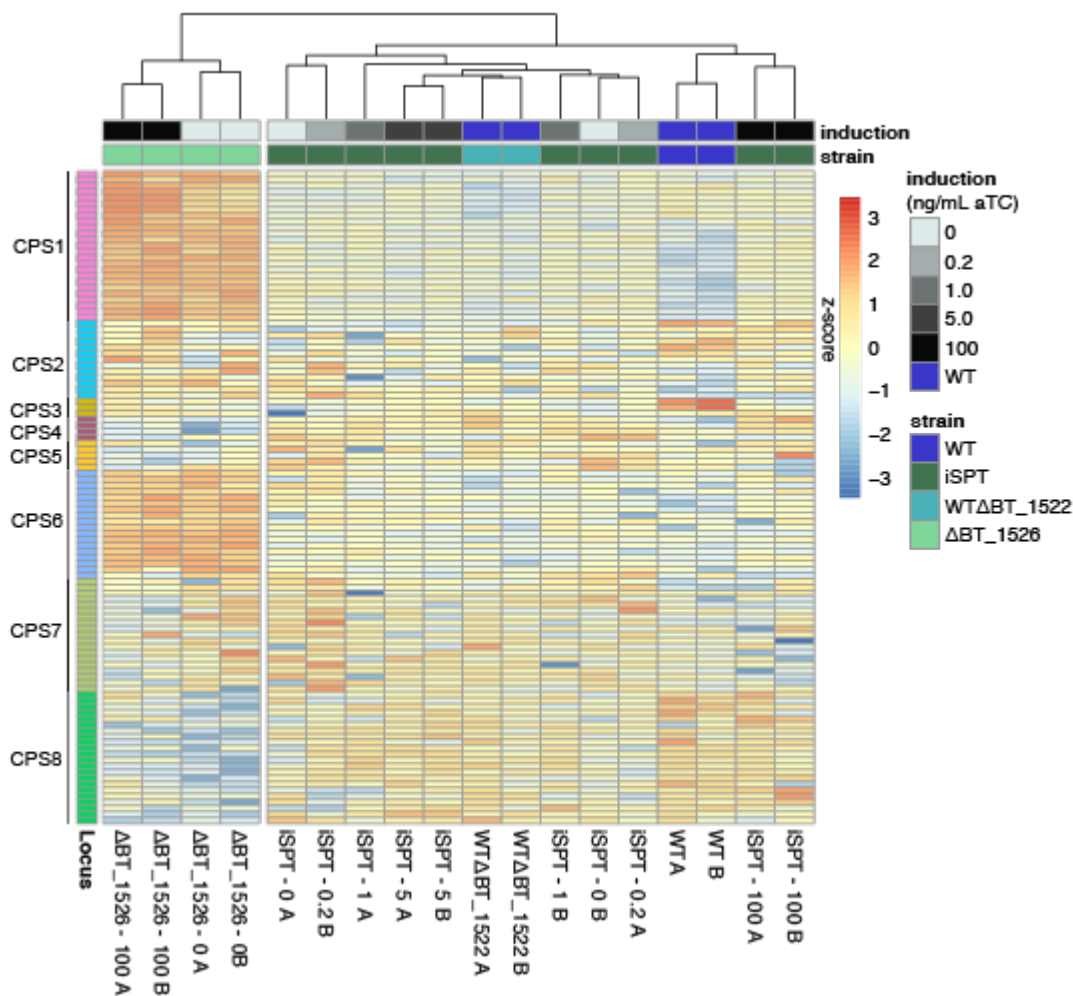

195

196 **Figure 4. Deletion of MIPS (BT\_1526) alters expression of genes for capsular polysaccharide**  
 197 **synthesis pathway loci in BT.** Gene expression data (normalized  $\log_2$  expression values, scaled by  
 198 row, with Euclidean column clustering) in the 8 BT capsular polysaccharide synthesis (CPS) loci. For  
 199 easier visualization, genes were filtered to include those in which maximum  $\log_2$ -normalized  
 200 expression is  $> 1.5$  and exclude those with maximum absolute  $\log_2$ -fold-change difference in  
 201 expression  $< 1.5$  in all pairwise comparisons of conditions. Color in the far left column indicates gene  
 202 assignment to one of 8 CPS loci. Strains tested include WT BT, iSPT, WT $\Delta$ BT\_1522, and  $\Delta$ BT\_1526 in  
 203 the iSPT background. SPT induction in the iSPT strains at 0, 0.2, 1.0, 5.0, or 100 ng/mL aTC  
 204 induction is indicated in shades of grey. Labels below each column indicate strain and aTC induction  
 205 (ng/mL aTC) redundantly with the color key; "A" and "B" labels represent biological replicates.  
 206

207 To assess whether PI-DHC loss alone was responsible for the capsule effect in BT, we  
208 monitored the transcriptional response of WT $\Delta$ BT\_1522 at early stationary phase, grown in minimal  
209 medium with glucose as the sole carbon source. Compared to its BT background strain, the  
210 WT $\Delta$ BT\_1522 strain had differential expression of 37 genes above a cutoff of 1.5 absolute log<sub>2</sub>-fold-  
211 change (Table S2). These included many hypothetical proteins and membrane-associated proteins,  
212 including those involved in carbohydrate metabolism, such as SusD starch-binding protein homologs  
213 (BT\_3025 and BT\_2806). Pathway enrichment analysis of these 37 genes showed an enrichment of  
214 transcripts involved in sugar degradation (specifically, 5-dehydro-4-deoxy-D-glucuronate  
215 degradation,  $p = 0.006$ , Fisher exact test, Benjamini-Hochberg correction), acetate and ATP formation  
216 from acetyl-CoA ( $p = 0.098$ ), and carboxylate degradation ( $p = 0.098$ ). In plants and yeasts, which also  
217 produce inositol-linked SLs, these lipids are critical for fundamental aspects of the organism's  
218 physiology, for example, protein anchoring and programmed cell death in plants<sup>38</sup>. The yeast  
219 homolog of BT\_1522 is an antifungal target, highlighting its core function in yeast physiology, which  
220 is inhibited by the cyclic depsipeptide natural product aureobasidin (hence the name AUR1)<sup>39</sup>.  
221 Though WT $\Delta$ BT\_1522 had few transcriptomic changes relative to WT controls, its affected pathways  
222 appear central to carbohydrate degradation and energy synthesis. As such, other inositol derivatives  
223 or PI, not PI-DHC, are implicated in the altered capsule expression of the  $\Delta$ BT\_1526 strain.

224 Inositol has not been previously reported as a component of BT capsule<sup>40</sup>, perhaps due to its  
225 common use as an internal standard in the HPAEC-PAD analysis of capsule components. Using an  
226 alternative standard, we detected inositol in the capsular monosaccharide components of WT BT,  
227 iSPT, and WT $\Delta$ BT\_1522 strains (Fig. 2D). However, we did not detect inositol in the capsules of SPT-  
228 induced and -uninduced  $\Delta$ BT\_1526 strains. To assess whether the transcriptional trend of the  
229  $\Delta$ BT\_1526 to upregulate CPS1 and CPS6 was reflected in the visible cell capsule, we performed  
230 scanning electron microscopy on iSPT and  $\Delta$ BT\_1526 strains with and without SL induction (Fig. 5A).  
231 Capsule structures were heterogeneous in both strains, but in comparison to the iSPT background  
232 strain, more of the cells of the  $\Delta$ BT\_1526 strain exhibited a dense structure extending from the cell

233 surface, with apparent exopolysaccharide connecting adjacent cells. This was particularly noticeable  
234 when SL synthesis was not induced.

235         These results indicate that inositol lipid synthesis is tied in a regulatory fashion to capsule  
236 specificity in BT. The CPS loci expressed in a BT population influence both recognition by the host  
237 adaptive immune system and bacteriophage predation<sup>40,41</sup>. A role for SLs in mediating the  
238 interaction of a microbe with environmental stresses and external threats (*e.g.* antibiotics such as  
239 polymyxin and phages, respectively) has also been shown in the freshwater bacterium *Caulobacter*  
240 *crescentus*, which responds to phosphate starvation by producing complex glycosphingolipids  
241<sup>42</sup>. Given the remodeling of the capsule observed here when inositol pathways are genetically  
242 manipulated, inositol synthesis in BT could influence BT capsule detection by host immunity or  
243 phage. The regulatory link between inositol lipid synthesis and capsule specificity implies an indirect  
244 role of inositol in host-BT interactions.

245         We assessed how widespread the capacity for inositol lipid synthesis is in the Bacteroidetes.  
246 Inositol SLs have only been described in few bacterial species to date<sup>14-16</sup>. We investigated the  
247 extent of this biosynthetic capacity across ten representative members of the phylum Bacteroidetes  
248 and in other known bacterial SL-producers. Using a homology cutoff of an e-value less than 1e-8, we  
249 compared the BT amino acid sequences for MIPS, PIPS, PIPh, PI-DHC synthase, and the BT InsP6  
250 phosphatase, MINPP<sup>43</sup> (BT\_1526, BT\_1523, BT\_1525, BT\_1522, and BT\_4744, respectively) to these  
251 related genera (Fig. 5B; Table S4). TLC analysis of lipids from these species revealed that most species  
252 with homology to the BT MIPS and PI-DHC synthase had lipid bands consistent with PI and/or PI-DHC  
253 in line with their genomically-predicted capacity (the exception was *Flectobacillus major*, a  
254 Proteobacterial species with genes encoding protein homology but that did not produce inositol  
255 lipids under tested conditions). However, we were surprised to also observe lipid bands consistent  
256 with the synthesis of PI and PI-DHC in species lacking homology to BT\_1522/23/25. HPLC-MS analysis  
257 of these lipids confirmed that two species genomically predicted to lack inositol lipids (*B. vulgatus*

258 and *P. veroralis*) in fact produced the same PI-DHC species as those with homology to

259 BT\_1522/23/25 (*B. uniformis* and *P. copri*) (Fig. 5C).

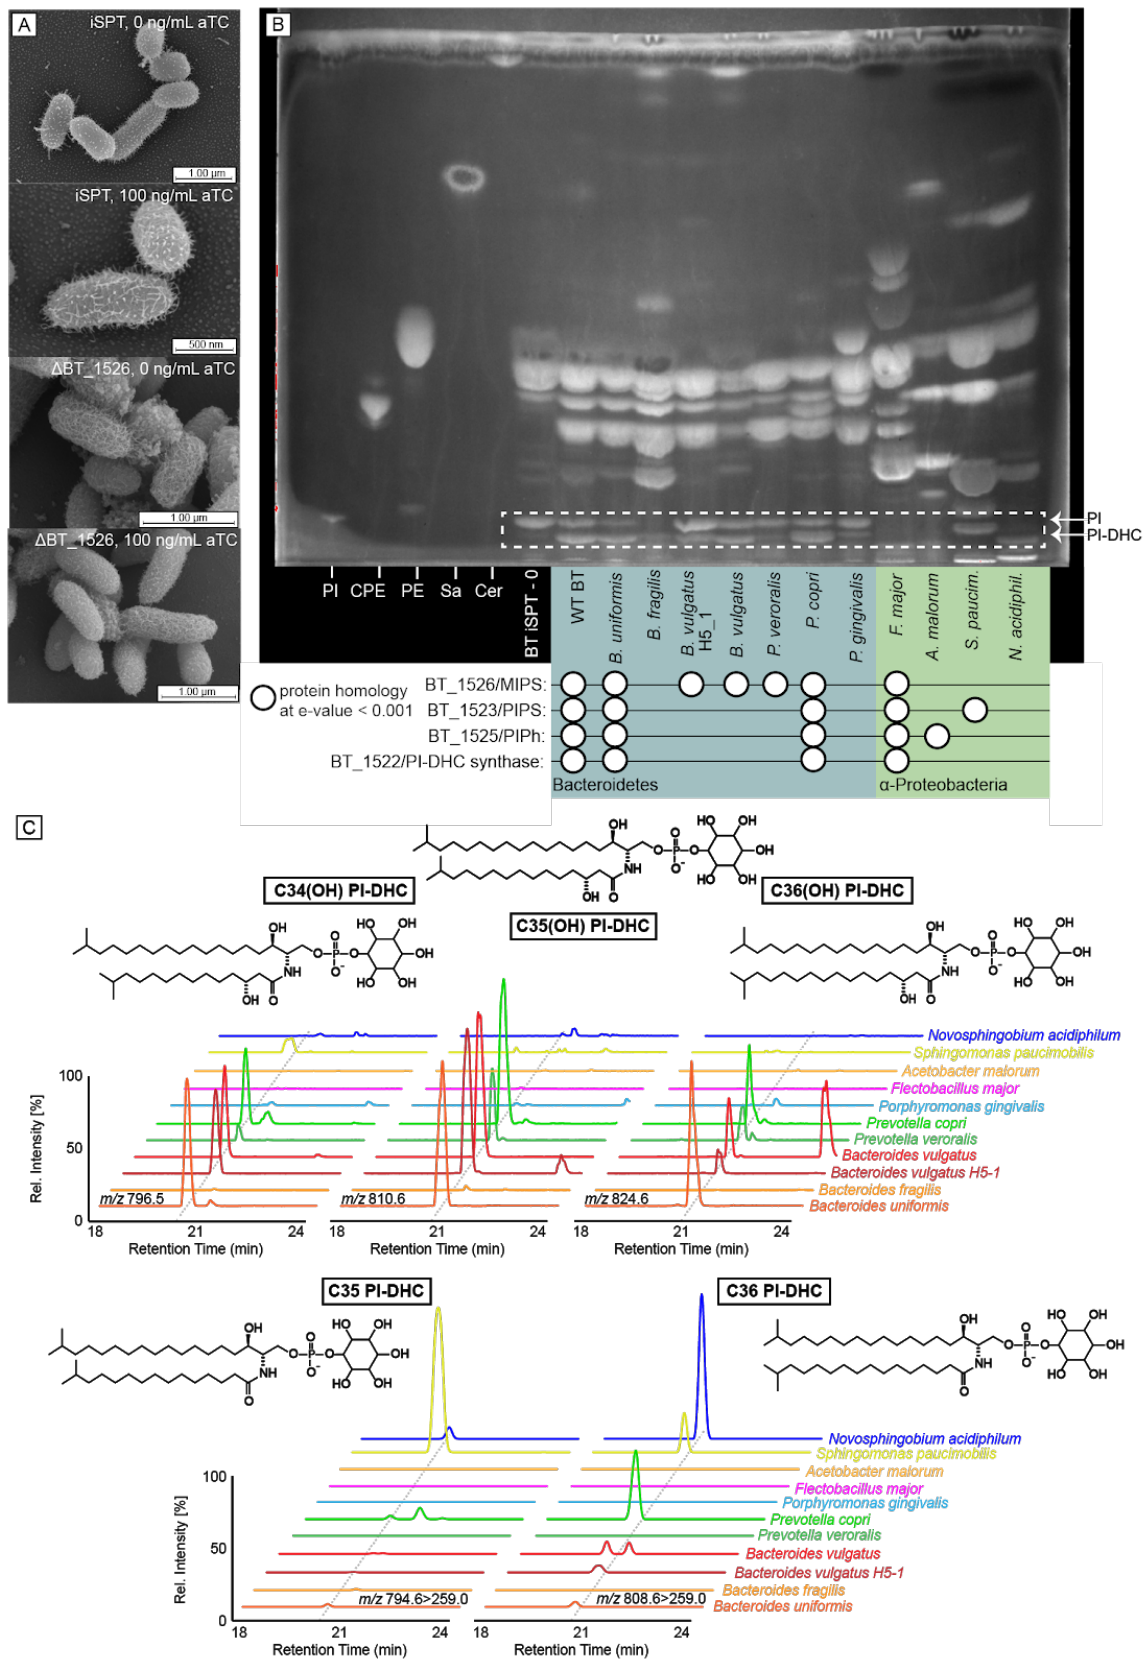

260

261 **Figure 5. The capacity to produce PI-DHC is widespread among sphingolipid-producing bacteria.** (A)  
262 Scanning electron microscopy of the iSPT and  $\Delta$ BT\_1526 strains at 0 and 100 ng/mL aTC induction of  
263 SPT grown in minimal medium. (B) TLC of lipid standards and lipid extractions from a diverse array of  
264 sphingolipid-producing bacteria. Lanes 1-5, left to right: PI = 16:0 phosphatidylinositol; CPE =  
265 ceramide phosphoethanolamine; PE = egg yolk phosphatidylethanolamine, Sa = d18:0 sphinganine,  
266 Cer = d18:1/18:0 ceramide. From the sixth lane onward are standard Folch (non-acidic) lipid  
267 extractions from: BT iSPT 0 ng/mL aTC induction (no SL), WT BT, *Bacteroides uniformis* (DSM 6597),  
268 *Bacteroides fragilis* (DSM 2151), *Bacteroides vulgatus* H5\_1 (DSM 108228), *Bacteroides vulgatus*  
269 (DSM 1447), *Prevotella veroralis* (ATCC 33779), *Prevotella copri* (DSM 18205), *Porphyromonas*  
270 *gingivalis* (DSM 20709), *Flectobacillus major* (DSM 103), *Acetobacter malorum* (DSM 14337),  
271 *Sphingomonas paucimobilis* (ATCC 29837), and *Novosphingobium acidiphilum* (DSM 19966).  
272 Homology to BT protein sequences in the inositol lipid cluster using NCBI BlastP (at e-values below  
273 0.001) are indicated below species names with a white circle. Bacteroidetes spp. are on a blue  
274 background; alpha-Proteobacteria spp. are on a green background. (C) Predicted structures and ion  
275 chromatograms of PI-DHC structures in lipids extracted from the diverse sphingolipid-producing  
276 species shown in the same order in panel B. Phosphoinositol dihydroceramide structures include  
277 C34(OH) PI-DHC, C35(OH) PI-DHC, C36(OH) PI-DHC, C35 PI-DHC, and C36 PI-DHC.  
278

279 To understand this unexpected result, we searched the genomes of related species  
280 containing a BT\_1526 (MIPS) homolog but lacking homology to the remainder of the BT cluster. Using  
281 PHI-BLAST with the conserved catalytic residues in BT\_1523 (DX<sub>2</sub>DGX<sub>2</sub>AR...GX<sub>3</sub>DX<sub>3</sub>D)<sup>22</sup>, we identified  
282 a predicted CDP-alcohol phosphatidyltransferase in the vicinity of the MIPS homolog in *Bacteroides*  
283 *vulgatus*. Expanding the analysis to include other genomes from the Bacteroidetes, we observed that  
284 almost every *Bacteroides/Prevotella* species containing a MIPS homolog had one of two clusters  
285 directly in the vicinity of the MIPS gene - either the BT-like cluster (BT\_1522/23/25), or an alternate  
286 cluster including an NTP transferase (nucleotidyltransferase) domain-containing protein, CDP-  
287 alcohol-phosphatidyltransferase, and haloalkanoate dehalogenase (HAD) hydrolase (Fig. 6). The NTP  
288 transferase domain family protein (NCBI Conserved Domain Family cl11394) also shares homology  
289 with a phosphocholine cytidyltransferase motif, suggesting this protein may synthesize cytidine 5'-  
290 diphosphoinositol (CDP-inositol), similar to the synthesis of CDP-inositol as a precursor to di-*myo*-  
291 inositol phosphate solutes in hyperthermophiles<sup>44</sup>. The HAD hydrolase superfamily is large and  
292 diverse, with the majority of characterized members functioning as phosphotransferases<sup>45</sup>. As a lipid  
293 phosphate phosphohydrolase, this HAD hydrolase may function similarly to AUR1<sup>46</sup>, acting as a PI-  
294 DHC synthase like BT\_1522.

295           The functions of these genes (HAD hydrolase, NTP transferase domain protein, and CDP-  
296 alcohol-phosphatidyltransferase) are not confirmed, but offer an alternative pathway enabling  
297 synthesis of PI-DHC without a PIP intermediate (similar to PI synthesis in eukaryotes<sup>47</sup>), with PI  
298 synthesis resembling the synthesis of phosphatidylethanolamine or phosphatidylcholine in the  
299 Kennedy pathway<sup>48,49</sup>. Following this logic, the NTP transferase protein would first synthesize CDP-  
300 inositol from *myo*-inositol phosphate and CTP. CDP-inositol and a diacylglycerol (DAG) substrate  
301 would then be converted to PI, and PI would be converted to PI-DHC by the HAD hydrolase. The MIPS  
302 homolog is most commonly clustered directly with these other genes, with some exceptions (*e.g.*,  
303 *Prevotella copri*) (Fig. 6). Interestingly, in *P. veroralis*, the CDP-alcohol phosphatidyltransferase and  
304 HAD hydrolase proteins are fused (Supp. Fig. 5), suggesting the possibility for a cohesive single-  
305 enzyme conversion of CDP-inositol to PI-DHC through a PI intermediate. Some additional putative  
306 enzymes are shared in the vicinity of both clusters, including genes annotated as a  
307 lysylphosphatidylglycerol synthase (BT\_1521 homolog) and a carboxypeptidase-regulatory-like  
308 domain protein (BT\_1527 homolog) (Fig. 6). This alternative pathway could explain PI-DHC synthesis  
309 by *P. veroralis* and *B. vulgatus* despite lack of homology to the BT inositol lipid cluster  
310 (BT\_1522/23/25).

311           Among the Proteobacteria species tested, *Sphingomonas paucimobilis* and *Novosphingobium*  
312 *acidiphilum* did not make hydroxylated SLs (data not shown). Despite lacking homology to either the  
313 BT-like or putative alternative inositol lipid cluster, *N. acidiphilum* produced a SL with a retention  
314 time and headgroup fragmentation consistent with *Bacteroides* PI-DHC fragmentation (Supp. Fig.  
315 2A). *S. paucimobilis* also produced a lipid with fragmentation similar to *Bacteroides* PI-DHC, but did  
316 not produce the fragment at 241 m/z, suggesting a phosphorylated-hexose DHC unlike those  
317 produced by *Bacteroides* (Supp. Fig. 2B). In addition, the TLC analysis (Fig. 5B) shows a lipid band in  
318 the PI/PI-DHC region for mouth-associated *Porphyromonas gingivalis*, which is likely a  
319 phosphorylglycerol-DHC (Supp. Fig. 2C)<sup>50</sup>.



A

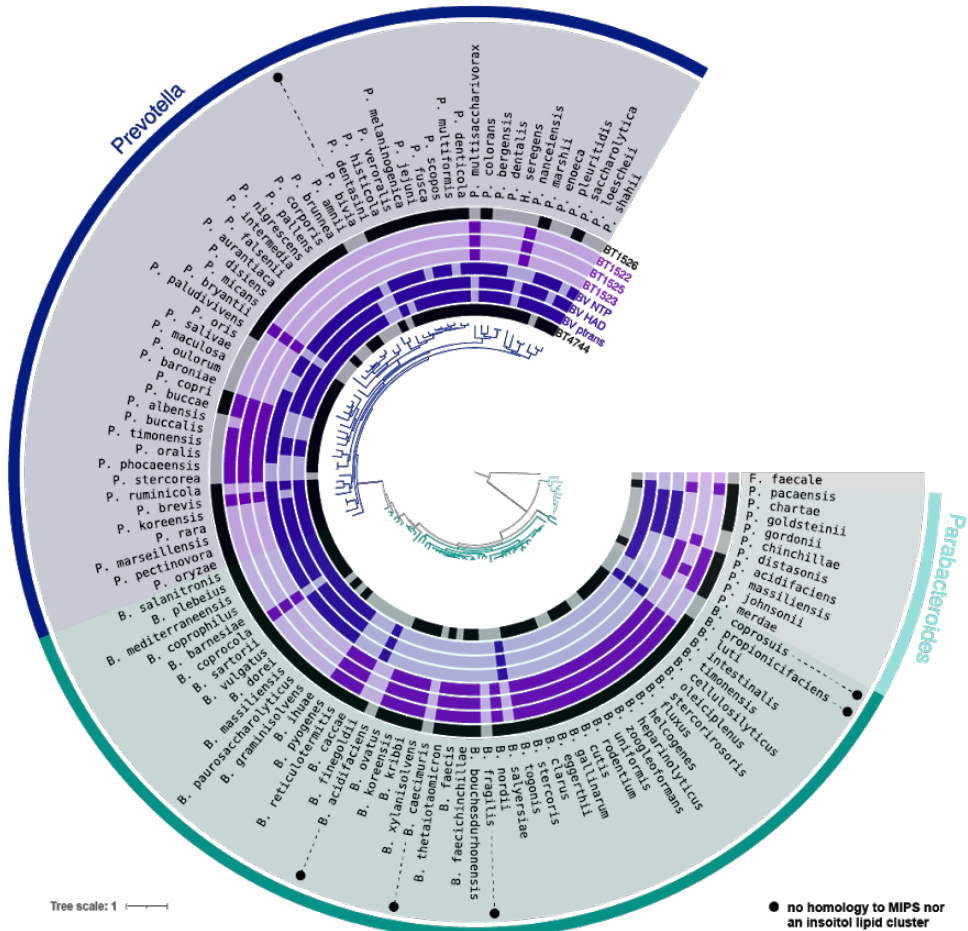

B

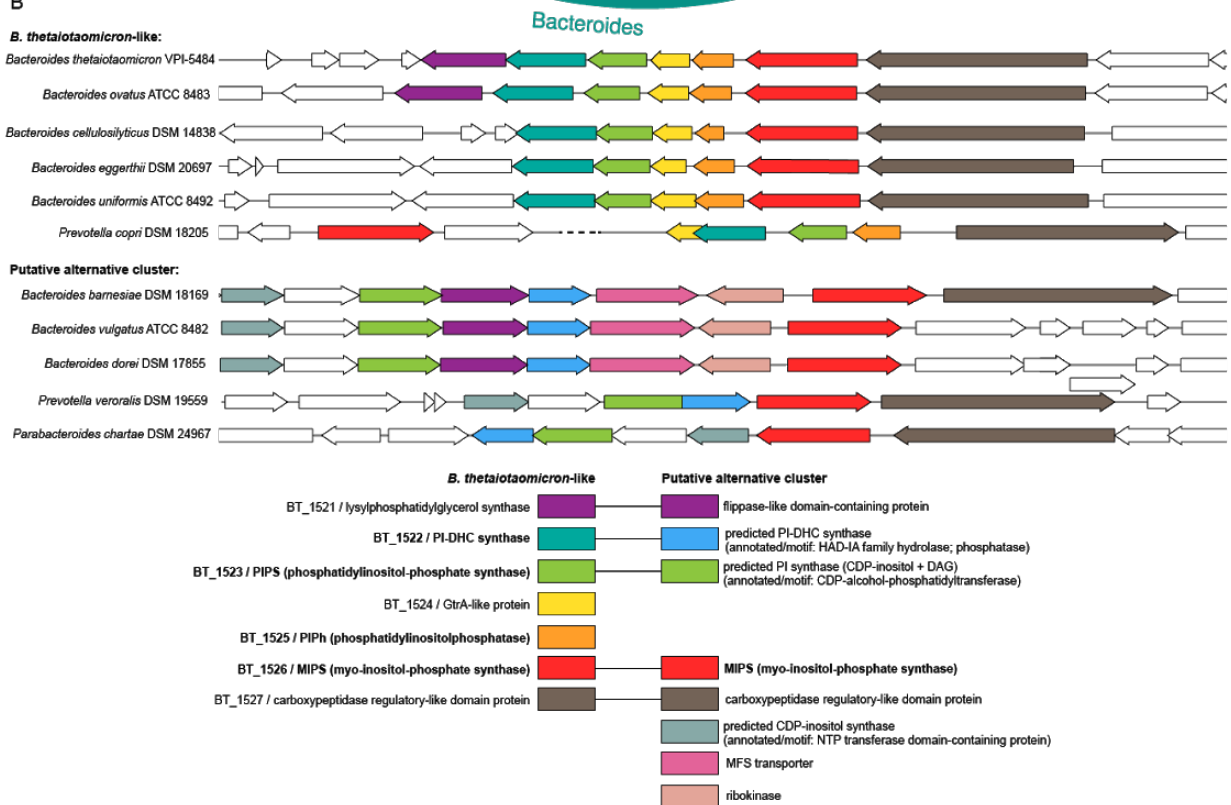

320

321 **Figure 6. The capacity for inositol lipid synthesis is widespread within the Bacteroidetes.** (A)  
 322 Maximum likelihood based phylogeny of representative *Bacteroides*, *Prevotella*, and *Parabacteroides*

323 species, produced from 71 conserved single copy genes present in all genomes (identified and  
324 concatenated using Anvi'o), and generated by RAxML (best tree; substitution model PROTCAT, matrix  
325 name DAYHOFF, Hill-climbing algorithm, bootstrap 50); *Flavobacterium faecale* is included as an  
326 outgroup. The rings surrounding the tree indicate species with genes that have NCBI BlastP homology  
327 to the BT inositol lipid cluster (in light purple; BT\_1522, BT\_1523, BT\_1525, BT\_1526), the BT Minpp  
328 (BT\_4744), or representative proteins from the *Bacteroides vulgatus* putative alternative inositol lipid  
329 cluster (in dark purple; phosphatidyltransferase: BVU\_RS13105, HAD hydrolase: BVU\_RS13115, NTP  
330 transferase: BVU\_RS13095). Homology at an e-value below 1e-8 is indicated by dark coloration in the  
331 inner circles. (B) Genomic regions surrounding the BT\_1526/MIPS homolog in representative  
332 Bacteroidetes, compiled using the PATRIC 3.6.9 Compare Region Viewer. Protein homology  
333 (determined using NCBI-BlastP) to proteins in the BT-like inositol lipid metabolism cluster (left in key)  
334 or the *Bacteroides vulgatus*-like putative alternative inositol metabolism cluster (right in key) is  
335 indicated by color. The functions of enzymes in bold were characterized in this study; sequences with  
336 predicted redundant functions between both clusters are linked in the key.  
337

338           To assess the distribution of the BT inositol lipid cluster (BT\_1522/23/25) and the potential  
339 alternative pathway among the Bacteroidetes, we searched for homology in 162 representative  
340 species of these genera (*Bacteroides*, *Prevotella*, *Parabacteroides*, *Porphyromonas*,  
341 *Sphingobacterium*, and *Chlorobium* spp.) (Table S4). Most strains with a homolog to BT\_1522,  
342 BT\_1523, or BT\_1525, in fact have homologs of all three of these enzymes, with a distribution that  
343 does not track phylogeny, supporting the lateral exchange of this full cluster among these host-  
344 associated species (Fig. 6). Roughly three-quarters of species we assessed belonging to the  
345 *Bacteroides*, *Prevotella*, and *Parabacteroides* genera have a MIPS/BT\_1526 homolog, and most  
346 species with a MIPS homolog contain either the BT-like inositol lipid cluster or the putative  
347 alternative cluster. One notable exception is *Bacteroides fragilis*, which does not produce inositol  
348 lipids but synthesizes the bioactive glycosphingolipid  $\alpha$ -galactosylceramide<sup>51,52</sup>. The BT-like inositol  
349 lipid gene cluster is roughly two times more common than the alternative cluster among *Bacteroides*  
350 species, while the alternative cluster is about four times more common among the *Prevotella*  
351 species. Homologs to proteins in either cluster were absent or highly infrequent in the genera  
352 *Porphyromonas*, *Sphingobacterium*, and *Chlorobium*, with the exceptions of moderate alternative  
353 cluster homology in *Sphingobacteria*, and extensive BT\_1525 homology in *Chlorobium* (Table S4),  
354 which may reflect a true phosphatidylglycerophosphatase function.

355           Our comparative genomic analyses revealed inositol lipid synthesis to be far more  
356 widespread in host-associated Bacteroidetes than previously thought. Although the putative  
357 alternative pathway remains to be functionally confirmed, the vast majority of species encoded one  
358 of the two pathways, with the alternative pathway more common in the *Prevotella*. The extensive  
359 prevalence of this function is in agreement with the widespread capacity in gut commensals for  
360 phytate (InsP6) degradation, which releases phosphorylated inositol derivatives. Although InsP6  
361 phosphatase (Minpp) is rare across Bacteria (present in only 2.2% of completed genomes in EMBL-  
362 EBI in 2014), the majority of these enzymes are found in gut microbiome-affiliated species<sup>43</sup>. In  
363 addition to the widespread capacity for *de novo* synthesis of inositol and its lipids reported here,  
364 these observations suggest that inositol and inositol lipid cycling in the gut are fundamental  
365 attributes of the gut microbiome.

366           Bacterial lipids with high structural similarity to eukaryotic bioactive lipids (*e.g.*, SLs) have  
367 been shown to influence the metabolism and immune homeostasis of their hosts<sup>14,19,51,53–55</sup>.  
368 Likewise, bacteria are already known to manipulate their host through inositol and inositol lipid  
369 metabolic pathways<sup>43,56</sup>, and many bacterial and viral pathogens have also adapted to hijack the  
370 host phosphoinositide system<sup>57,58</sup>. Thus, a precedent exists for trans-kingdom manipulation of  
371 inositol levels, to either a beneficial or detrimental outcome for the host. As one of the most  
372 abundant phyla within the human gut, the widespread synthesis of inositol lipids from gut-associated  
373 Bacteroidetes (*Bacteroides*, *Prevotella*, and *Parabacteroides* spp.) could represent a significant  
374 contribution to the lipid milieu of the gut. Of the six most prevalent and abundant *Bacteroides*  
375 species in the human gut<sup>59</sup>, five have genes with homology to the BT-like inositol lipid cluster (*B.*  
376 *cellulosyliticus*, *B. eggerthii*, *B. ovatus*) or the potential alternative cluster (*B. dorei*, *B. vulgatus*),  
377 indicating potential for inositol lipid synthesis. How these lipids interact with the human host remains  
378 to be investigated.

379

380

## 381 **Conclusion**

382 Inositol lipids have only recently been reported in commensal gut bacteria. In this study, we  
383 characterized the gene cluster recently hypothesized to be involved in bacterial inositol lipid  
384 synthesis in BT, in the first known study to show a functional role for these genes in the  
385 Bacteroidetes. BT synthesizes PI using a mycobacterial-like pathway with a PIP intermediate;  
386 previously, the bacterial PI synthesis pathway lacked a PIPh, which we have identified here as  
387 *BT\_1525*. We also identified a putative alternative pathway for PI-DHC synthesis common among  
388 *Prevotella* species that lacks a PIP intermediate resembling the eukaryotic Kennedy pathway for  
389 phosphatidylethanolamine and phosphatidylcholine synthesis. The majority of Bacteroidetes encode  
390 one or the other of these pathways, indicating that inositol lipid production is a fundamental trait in  
391 the phylum. Together with the importance of inositol lipids in pathogen-host interactions<sup>60</sup>, their  
392 high prevalence in the host-associated Bacteroidetes suggests an unexplored role in host  
393 interactions, potentially mediated both directly through provisioning and indirectly via effects on the  
394 capsule.

395  
396

## 397 **Materials and Methods**

### 398 **Bacterial strains and culturing conditions**

399 Unless otherwise stated, all liquid *B. thetaiotaomicron* VPI-5482 (BT) cultures were grown  
400 anaerobically (95% N<sub>2</sub> and 5% CO<sub>2</sub> atmosphere) at 37°C in supplemented BHI media (BHIS; 37 g/L brain-heart  
401 infusion, 5 g/L yeast extract, 1 mg/L menadione, 1 mg/L resazurin, 10 mg/L hemin, 0.5 g/L cysteine-HCl). *E. coli*  
402 cultures were grown aerobically at 37°C in Luria broth with shaking. Final concentrations of antibiotics and  
403 selection agents were as follows: erythromycin 25 µg/mL, gentamicin 200 µg/mL, streptomycin 100 µg/mL,  
404 carbenicillin 100 µg/mL, 5-fluoro-2'-deoxyuridine 200 µg/mL. In select experiments, BT was grown in  
405 Bacteroides minimal media (BMM); per liter: 13.6 g KH<sub>2</sub>PO<sub>4</sub>, 0.875g NaCl, 1.125 g (NH<sub>4</sub>)<sub>2</sub>SO<sub>4</sub>, 5 g glucose, (pH to  
406 7.2 with concentrated NaOH), 1 mL hemin (500 mg dissolved in 10 mL of 1M NaOH then diluted to final volume  
407 of 500 mL with water), 1 mL MgCl<sub>2</sub> (0.1 M in water), 1 mL FeSO<sub>4</sub>·7H<sub>2</sub>O (1 mg per 10 mL of water), 1 mL vitamin

408 K3 (1 mg/mL in absolute ethanol), 1 mL CaCl<sub>2</sub> (0.8% w/v), 250 µL vitamin B12 solution (0.02 mg/mL), 0.5 g L-  
409 cysteine HCl.

410 For lipid analysis of non-BT strains: *Sphingomonas paucimobilis* (ATCC 29837) was grown aerobically at  
411 30°C in nutrient broth (per L: 5.0 g peptone, 3.0 g meat extract; pH 7.0). *Bacteroides fragilis* (DSM 2151),  
412 *Porphyromonas gingivalis* (DSM 20709), *Bacteroides uniformis* (DSM 6597), *Bacteroides vulgatus* H5\_1 (DSM  
413 108228), *Bacteroides vulgatus* (DSM 1447), *Prevotella veroralis* (ATCC 33779), and *Prevotella copri* (DSM  
414 18205) were grown anaerobically at 37°C in BHIS. *Flectobacillus major* (DSM 103) was grown at 26°C in DSM  
415 Medium 7 (per L: 1.0 g glucose, 1.0 g peptone, 1.0 g yeast extract; pH 7.0). *Acetobacter malorum* (DSM 14337)  
416 was grown at 28°C in DSM Medium 360 (per L: 5.0 g yeast extract, 3.0 g peptone, 25.0 g mannitol).  
417 *Novosphingobium acidiphilum* (DSM 19966) was grown at 28°C in DSM Medium 1199 (per L: 1.0 g glucose, 1.0  
418 g yeast extract, 1.0 g peptone; pH 5.5).

#### 419 Generation of BT knockouts and inducible SPT strain

420 Genetic manipulations in the *Bacteroides thetaiotaomicron* VPI-5482 tdk (“WT”) strain were  
421 performed using double recombination from a suicide plasmid as previously described<sup>20</sup>. The generation of the  
422 *BT\_0870* (SPT) knockout is previously described<sup>54</sup>. To create the inducible SPT (iSPT) strain, three TetR  
423 cassettes were inserted into the  $\Delta$ BT\_0870 genome with the constitutive PBT1311 promoter as previously  
424 described<sup>27</sup>, with the native SPT (*BT\_0870*) sequence reintroduced under the inducible P1TDP promoter.  
425 *BT\_1522*, *BT\_1523*, *BT\_1525*, and *BT\_1526* were knocked out using the same process in both the WT and iSPT  
426 strains. Complements for each enzyme were created in the iSPT knockout strains, likewise using the  
427 constitutive PBT1311 promoter and native BT sequences and integrated genomically, just upstream of the  
428 inositol gene cluster. Plasmids, strains, primers, and gene sequences are listed in Table S5. All constructs were  
429 verified by Sanger sequencing.

#### 430 Bacterial lipid extraction and thin layer chromatography

431 BT strains were grown 14-20 hours in BHIS; all other strains were grown in the media and  
432 temperatures described above to density. **“Standard” (non-acidic) lipid extraction:** Bacteria were pelleted at  
433 3500 x g for 15 minutes, the pellet washed in PBS, and re-spun. The washed lipid pellets were lipid extracted by  
434 the Folch method<sup>61</sup>, the organic fraction dried under nitrogen, the lipid film re-suspended in 2:1 (v/v)  
435 chloroform:methanol. **PIP lipid extraction:** To detect PIP, lipids were extracted according to the PI(3)P Mass  
436 ELISA Kit (Echelon Biosciences Inc.) protocol. Cells from 50-ml BHIS cultures were pelleted at 3500 x g for 15

437 minutes at 4°C, resuspended in 5-mL cold 0.5 M trichloroacetic acid (TCA), incubated 5 minutes on ice, and  
438 pelleted at 3500 x g for 15 minutes at 4°C. The pellets were washed twice in 3 mL 5% TCA with 1 mM EDTA,  
439 then neutral lipids were extracted twice by vortexing the pellet in 3 mL 2:1 methanol:chloroform for 10  
440 minutes. The resulting pellets were extracted into 2.25 mL methanol:chloroform:12 N HCl (80:40:1), 0.75 mL of  
441 chloroform and 1.35 mL of 0.1 N HCl added and vortexed. The lower fraction was dried under nitrogen and  
442 resuspended in 20:9:1 chloroform:methanol:water for TLC.

#### 443 Thin layer chromatography of lipids

444 Lipid extracts were applied to a silica HPTLC plate with concentration zone (Supelco #60768), with  
445 loading volumes normalized to the OD<sub>600</sub> of original cultures. Plates were developed in a 62:25:4 (v/v)  
446 chloroform:methanol:ammonium hydroxide system (for standard lipid extractions) or 48:40:7:5  
447 chloroform:methanol:water:ammonium hydroxide (for PIP extractions), then sprayed with primuline (0.1  
448 mg/mL in 4:1 v/v acetone:dH<sub>2</sub>O), and imaged under UV transillumination (365 nm). Lipid standards include 16:0  
449 phosphatidylinositol (Avanti #850141), 18:1 PI(3)P (Avanti #850150), ceramide phosphorylethanolamine  
450 (Sigma-Aldrich #C4987), egg yolk phosphatidylethanolamine (Pharmacoepia), d18:1/18:0 ceramide (Cayman  
451 #19556), and d18:0 sphinganine (Avanti #860498).

#### 452 Sample Prep For HPLC-MS

453 Samples were frozen over liquid nitrogen and lyophilized to dryness. 1 mL of HPLC grade methanol  
454 was added to the dried material and the mixture was sonicated for 3 min (on/off pulse cycles of 2 second on, 2  
455 seconds off, at power 100%) using a Qsonica Ultrasonic Processor (Model Q700) with a water bath cup horn  
456 adaptor (Model 431C2), with water bath flow to maintain approximately room temperature. Samples were  
457 then moved to an end-over-end rotator and extractions proceeded for 12 hours. Samples were then  
458 centrifuged at 18000 G for 30 minutes at 4 °C. The supernatant was transferred to a fresh centrifuge tube and  
459 solvent was dried with a Thermo Scientific Savant SpeedVac SPD130DLX. The dried material was resuspended  
460 in 200 µL HPLC-grade methanol, briefly sonicated, and centrifuged as before. The concentrated extract was  
461 transferred to HPLC vial with a 300 µL glass insert and stored at 4 °C until further analysis.

#### 462 HPLC-MS instrumentation

463 LC-MS analysis was performed on a ThermoFisher Scientific Vanquish Horizon UHPLC System coupled  
464 with a ThermoFisher Scientific TSQ Quantis Triple Quadrupole mass spectrometer equipped with a HESI ion  
465 source. All solvents and reagent for HPLC-MS were purchased as Optima LC-MS grade (Fisher Scientific).

466 HPLC-MS generalized method

467 Mobile phase A was 94.9% water, 5% methanol, 0.1% formic acid (v/v) with 10 mM ammonium  
468 acetate. Mobile phase B was 99.9% methanol, and 0.1% formic acid (v/v). 1  $\mu$ L of extract was injected and  
469 separated on a mobile phase gradient with an Agilent Technologies InfinityLab Poroshell 120 EC-C18 column  
470 (50 mm  $\times$  2.1 mm, particle size 2.7  $\mu$ m, part number: 699775-902) maintained at 50  $^{\circ}$ C. A/B gradient started at  
471 15% B for 1 min after injection and increased linearly to 100% B at 22 min and held at 100% B for 5 min, using a  
472 flow rate 0.6 mL/min. Full Scan Q1 mass spectrometer parameters: spray voltage 2.0 kV for negative mode, ion  
473 transfer tube temperature 350  $^{\circ}$ C, vaporizer temperature 350  $^{\circ}$ C; sheath, auxiliary, and spare gas 60, 15, and 2,  
474 respectively. Tandem mass spectrum analysis was carried out with Product Ion Scan mode with the following  
475 additions: collision energy: 30 V, CID gas 1.5 mTorr.

476 HPLC-MS method for phosphatidylinositol phosphates

477 The method was slightly modified from Bui et al. 2018<sup>62</sup>. Mobile phase A was 99.9% water, 0.1% N,N-  
478 Diisopropylethylamine (v/v) with 10  $\mu$ M Disodium EDTA. Mobile phase B was 99.9% acetonitrile, 0.1% N,N-  
479 Diisopropylethylamine (v/v). 3  $\mu$ L of extract was injected and separated on a mobile phase gradient with an  
480 Kinetex EVO C18 UHPLC column, 2.1  $\times$  150 mm, 1.7 $\mu$ m (Phenomenex, CA, PN:00F-4726-AN) maintained at 60  
481  $^{\circ}$ C. A/B gradient started at 38% B for 6 min after injection and increased linearly to 100% B at 12 min and held  
482 at 100% B for 3 min, using a flow rate 0.35 mL/min. Full Scan Q1 mass spectrometer parameters: spray voltage  
483 4.5 kV for negative mode, ion transfer tube temperature 325  $^{\circ}$ C, vaporizer temperature 350  $^{\circ}$ C; sheath,  
484 auxiliary, and spare gas 50, 15, and 1, respectively. Tandem mass spectrum analysis was carried out with  
485 Product Ion Scan mode with the following additions: collision energy: 30 V, CID gas 1.5 mTorr.

486 Capsule monosaccharide analysis

487 For capsule extraction, 16-hour 20 mL BHIS cultures were normalized to OD<sub>600</sub>, centrifuged 3500 x g  
488 for 20 min, and gently washed two times in 50 mL of PBS (16000 x g, 4 min). The pellets were shaken (900  
489 RPM) in 500  $\mu$ L of aqueous phenol for three hours at room temperature, centrifuged at 5,000 x g for 20 min at  
490 4 $^{\circ}$ C, and the aqueous phase ethanol precipitated (cold absolute EtOH added to final concentration 80% v/v for  
491 2 hr at -20 $^{\circ}$ C, centrifuged at 18000 x g for 20 min at 4 $^{\circ}$ C, washed with cold 80% EtOH and centrifugation  
492 repeated). The resulting pellet was dissolved in PBS and treated with Roth Proteinase K (1 hr at 60 $^{\circ}$ C) and  
493 Merck Benzonase nuclease (20 min at 37 $^{\circ}$ C). Samples were dialyzed against water (1 kDa MWCO, G-Biosciences  
494 Tube-O-DIALYZER) and stored at -80 deg C prior to inositol quantification by the UCSD GlycoAnalytics Core.

495 Purification and enzymatic characterization of BT\_1526

496 The synthetic gene encoding the BT\_1526 ORF (wild type) was ordered from Genscript cloned into a  
497 pET-28a expression plasmid with a six-histidine tag at the N-terminus. The pET-BT\_1526 plasmid was used to  
498 transform *E. coli* BL21 (DE3) cells for overexpression. The BT\_1526 MIPS protein was expressed by culturing the  
499 transformed cells in LB medium supplemented with 35 µg/ml kanamycin at 37 °C 200 rpm shaking, until the  
500 cells reached the mid-exponential growth stage (OD<sub>600</sub> = 0.5). Protein expression was then induced by the  
501 addition of 0.1 mM IPTG for five hours with a reduced temperature of 30 °C with shaking 200 rpm. Cells were  
502 harvested by centrifugation 4000 x g, 4 °C and sonicated in 10 x v/w HisA buffer (50 mM Tris-HCl, 20 mM  
503 NH<sub>4</sub>Cl, 0.2 mM DTT and 30 mM imidazole, pH 7.5) to lyse the cells. The lysate was clarified by centrifugation at  
504 35,000 x g, 4 °C and the supernatant was loaded onto a 5 ml HisTrap column (Cytiva) equilibrated with HisA  
505 buffer. Unbound proteins were washed off the column with 20 column volumes of HisA prior to elution of the  
506 tagged BT\_1526 with HisB buffer (20 mM NH<sub>4</sub>Cl, 0.2 mM DTT and 500 mM imidazole, pH 7.5). The protein was  
507 then subjected to size-exclusion chromatography for polishing and buffer exchange. A Superdex S200 column  
508 was equilibrated with GF buffer (50 mM Tris-HCl and 150 mM NaCl) and sample added for isocratic elution over  
509 1.2 column volumes. Fractions from size-exclusion chromatography were analyzed by 15 % SDS-PAGE and  
510 fractions containing the pure BT\_1526 protein were pooled and used in subsequent experiments. The yield of  
511 recombinant BT\_1526 was typically >20mg per litre of *E. coli* culture.

512 Mass spectrometry analysis of purified MIPS

513 Samples were analysed in the positive ion mode using HPLC coupled to a Waters Synapt G2 QTOF with  
514 an electrospray ionisation source (ESI). 5-10 µL of 10 µM protein was injected onto a Phenomenex C4 3.6µ  
515 column. The conditions for the qTOF are as follows: source temperature 120 °C, back pressure 2 mbar, and  
516 sampling cone voltage 54V. The protein was eluted with a 12 minute gradient, starting at 5% acetonitrile with  
517 0.1% formic acid to 95% acetonitrile. The resulting spectra were processed and the charge state distributions  
518 deconvoluted using MassLynx V4.1 software.

519 Assay of BT\_1526 for MIPS activity.

520 The purified BT\_1526 was assayed for MIPS activity was based on a method published by Barnett <sup>28</sup>  
521 (see Fig. 3A). The assay was as follows: 1 µM enzyme, 0-50 mM D-glucose-6-phosphate, 0.8 mM NAD<sup>+</sup> for 1 hr  
522 at 25°C. The reaction was quenched with 20% TCA then 0.2M NaIO<sub>4</sub> was added for an hour at room  
523 temperature. Then 1.5M Na<sub>2</sub>SO<sub>3</sub> was added to remove excess NaIO<sub>4</sub>. The reagent mix was incubated for 1 hour



524 at room temperature, then the absorbance was measured on BioTek Synergy HT plate reader at 820 nm.

525 Values were determined with reference to inorganic phosphate standards.

#### 526 Crystallization of BT 1526

527 MIPS was initially screened using commercial kits (Molecular Dimensions and Hampton Research). The  
528 protein concentration was 11.4 mg/ml. The drops, composed of 0.1 ul or 0.2 ul of protein solution plus 0.1 of  
529 reservoir solution, were set up using a Mosquito crystallization robot (SPT Labtech) using the sitting drop vapor  
530 diffusion method. The plates were incubated at 20 °C and the initial hits were suitable for diffraction  
531 experiments. The condition yielding crystals that were subjected to X-ray diffraction was PACT F6 (Molecular  
532 Dimensions, 200 mM Sodium formate, 100 mM Bis Tris Propane pH 6.5, and 20 % (w/v) PEG 3350). The sample  
533 was cryoprotected with the addition of 20% PEG 400 to the reservoir solution.

#### 534 Data collection, structure solution, model building, refinement and validation of BT 1526

535 Diffraction data were collected at the synchrotron beamline I04 of Diamond light source (Didcot, UK)  
536 at a temperature of 100 K. The data set was integrated with XIA2<sup>63</sup> using DIALS<sup>64</sup> and scaled with Aimless (52).  
537 The space group was confirmed with Pointless<sup>65</sup>. The phase problem was solved by molecular replacement  
538 with Phaser<sup>66</sup> using PDB file 3QVT as search model. The model was refined with refmac<sup>67</sup> and manual model  
539 building with COOT<sup>68</sup>. The model was validated using Coot and Molprobit<sup>69</sup>. Other software used were from  
540 CCP4 cloud and the CCP4 suite<sup>70</sup>. Figures were made with ChimeraX<sup>71</sup>.

#### 541 Electron microscopy

542 Imaging was performed by the Electron Microscopy Core at the Max Planck Institute for  
543 Developmental Biology in Tübingen, Germany. For scanning electron microscopy (SEM), cells were fixed in 2.5%  
544 glutaraldehyde/4% formaldehyde in PBS for 2 hours at room temperature and mounted on poly-L-lysine-  
545 coated cover slips. Cells were post-fixed with 1% osmium tetroxide for 45 minutes on ice. Subsequently,  
546 samples were dehydrated in a graded ethanol series followed by critical point drying (Polaron) with CO<sub>2</sub>.  
547 Finally, the cells were sputter-coated with a 3 nm thick layer of platinum (CCU-010, Safematic) and examined  
548 with a field emission scanning electron microscope (Regulus 8230, Hitachi High Technologies) at an accelerating  
549 voltage of 3 kV.

#### 550 RNA-seq of BT at varied levels of SPT induction

551 Overnight cultures were used to inoculate (in duplicate) BMM media 1:2500 uninduced, or at one of  
552 five varied anhydrotetracycline (aTC) concentrations (0, 0.2, 1.0, 5.0, 100 ng/mL), and incubated at 37°C for 14

553 hours to an OD600 of 0.10-0.17. Cultures were spun at 3500 x g for 15 min and RNA was extracted from the  
554 bacterial pellet with QIAzol lysis reagent and the miRNeasy Mini Kit (Qiagen). rRNA was removed with the  
555 Bacterial RiboMinus Transcriptome Isolation Kit (Invitrogen) and the library prepared with the TruSeq Stranded  
556 Total RNA Library Kit (Illumina); libraries were pooled nine per lane and sequenced by HiSeq3000 (Illumina).

557 Quality assessment of reads was performed using FastQC pre- and post-quality filtering with bbdup  
558 (quality cutoff = 20)<sup>72</sup>. Reads were aligned to the Ensembl *B. thetaiotaomicron* VPI-5482 genome with bowtie2  
559 and assigned using htseq-count (alignment quality cutoff = 10)<sup>73-75</sup>. Differential expression analysis was  
560 performed with EdgeR and limma<sup>76,77</sup>: reads assigned to rRNA genes, “ambiguous,” or “no feature” were  
561 removed, lowly expressed genes were filtered, and gene expression distributions were normalized (method  
562 Trimmed Means of M values, “TMM”). Count data from BMM samples, which were in duplicate, were further  
563 normalized by Bayes moderated variance before calculation of differential expression (adjusted p-value via  
564 Benjamini-Hochberg method). Annotations were assigned from the JGI IMG database. Heatmaps were  
565 generated with pheatmap using normalized log2 expression values, scaled by row with Euclidean clustering.

#### 566 Phylogenies of homology to BT inositol lipid metabolic enzymes in diverse bacteria

567 For the smaller phylogeny of diverse sphingolipid-producers (Fig. 5D), homology to BT inositol and  
568 inositol lipid metabolism enzymes BT\_1522, BT\_1523, BT\_1525, and BT\_1526 was identified using NCBI Blast-P  
569<sup>78</sup> to the indicated species. For the larger phylogeny of Bacteroidetes and related genera (Fig. 5), all  
570 representative species for *Bacteroides*, *Prevotella*, *Parabacteroides*, *Porphyromonas*, *Flavobacterium*,  
571 *Sphingobacterium*, and *Chlorobium* genera with nomenclature recognized in the LPSN<sup>79</sup> were tested for  
572 homology to BT inositol metabolism enzymes BT\_1522, BT\_1523, BT\_1525, BT\_1526, and BT\_4744. For  
573 phylogenetic comparison in both trees, 71 single copy genes present in all genomes (HMM profile Bacteria\_71)  
574 were identified and concatenated using Anvi'o<sup>80</sup>, with alignment using MUSCLE<sup>81</sup>. RAxML<sup>82</sup> was used to  
575 generate a maximum likelihood tree (Protcat substitution model, Dayhoff matrix, Hill-climbing algorithm, 50  
576 bootstrap iterations). Strain accession numbers and Blast-P results are in Table S4.

577

#### 578 Acknowledgements

579 We are grateful to Katharina Hipp and Jürgen Berger of the Electron Microscopy Core Facility  
580 at the Max Planck Institute for Developmental Biology for their expert imaging of the bacterial  
581 capsules. We would also like to thank Andrew Goodman for providing relevant strains of *B.*

582 *thetaitaomicron*. We would like to thank Diamond Light Source (Oxfordshire, UK) for beamtime  
583 (proposal mx24948) and staff of beamline I04. Both DJC and JMW would like to acknowledge the  
584 funding provided by the Biotechnology and Biological Sciences Research Council (BBSRC, grants  
585 BB/V001620/1 and BB/V00168X/1).

586

587 **Data Availability**

588 The BT\_1526 MIPS structure analyzed during the current study is available in the Protein  
589 Data Bank repository, PDB 7NWR. Transcriptomic reads, mass spectrometry files, and all unique  
590 strains generated in this study are available from the corresponding author upon request. All  
591 remaining data generated during this study are included in this published article and its  
592 supplementary information files.

593

594

595            **References**

596. Nakase, M. *et al.* Mannosylinositol phosphorylceramide is a major sphingolipid component and is required for  
597 proper localization of plasma-membrane proteins in *Schizosaccharomyces pombe*. *J. Cell Sci.* **123**, 1578–1587  
598 (2010).
599. Megyeri, M., Riezman, H., Schuldiner, M. & Futerman, A. H. Making sense of the yeast sphingolipid pathway. *J.*  
600 *Mol. Biol.* **428**, 4765–4775 (2016).
601. Dickson, E. J. & Hille, B. Understanding phosphoinositides: rare, dynamic, and essential membrane  
602 phospholipids. *Biochem. J* **476**, 1–23 (2019).
603. Phan, T. K. *et al.* Phosphoinositides: multipurpose cellular lipids with emerging roles in cell death. *Cell Death*  
604 *Differ.* **26**, 781–793 (2019).
605. Haites, R. E., Morita, Y. S., McConville, M. J. & Billman-Jacobe, H. Function of phosphatidylinositol in  
606 mycobacteria. *J. Biol. Chem.* **280**, 10981–10987 (2005).
607. Yagüe, G., Segovia, M. & Valero-Guillén, P. L. Phospholipid composition of several clinically relevant  
608 *Corynebacterium* species as determined by mass spectrometry: an unusual fatty acyl moiety is present in  
609 inositol-containing phospholipids of *Corynebacterium urealyticum*. *Microbiology* **149**, 1675–1685 (2003).
610. Masayama, A. *et al.* *Streptomyces* phospholipase D mutants with altered substrate specificity capable of  
611 phosphatidylinositol synthesis. *Chembiochem* **9**, 974–981 (2008).
612. Belisle, J. T., Brandt, M. E., Radolf, J. D. & Norgard, M. V. Fatty acids of *Treponema pallidum* and *Borrelia*  
613 *burgdorferi* lipoproteins. *J. Bacteriol.* **176**, 2151–2157 (1994).
614. Nigou, J., Gilleron, M. & Puzo, G. Lipoarabinomannans: from structure to biosynthesis. *Biochimie* **85**, 153–166  
615 (2003).
616. Olson, D. K., Fröhlich, F., Farese, R. V., Jr & Walther, T. C. Taming the sphinx: Mechanisms of cellular  
617 sphingolipid homeostasis. *Biochim. Biophys. Acta* **1861**, 784–792 (2016).
618. Michell, R. H. Inositol lipids: from an archaeal origin to phosphatidylinositol 3,5-bisphosphate faults in human  
619 disease. *FEBS J.* **280**, 6281–6294 (2013).
620. Hannun, Y. A. & Obeid, L. M. Sphingolipids and their metabolism in physiology and disease. *Nat. Rev. Mol. Cell*  
621 *Biol.* **19**, 175–191 (2018).

62213. Megson, Z. A. *et al.* Inositol-phosphodihydroceramides in the periodontal pathogen *Tannerella forsythia*:  
623 Structural analysis and incorporation of exogenous myo-inositol. *Biochim. Biophys. Acta* **1851**, 1417–1427  
624 (2015).
62514. Brown, E. M. *et al.* Bacteroides-Derived Sphingolipids Are Critical for Maintaining Intestinal Homeostasis and  
626 Symbiosis. *Cell Host Microbe* **25**, 668–680.e7 (2019).
62715. Naka, T. *et al.* Structural analysis of sphingophospholipids derived from *Sphingobacterium spiritivorum*, the  
628 type species of genus *Sphingobacterium*. *Biochim. Biophys. Acta* **1635**, 83–92 (2003).
62916. Lorenzen, W., Bozhüyük, K. A. J., Cortina, N. S. & Bode, H. B. A comprehensive insight into the lipid composition  
630 of *Myxococcus xanthus* by UPLC-ESI-MS. *J. Lipid Res.* **55**, 2620–2633 (2014).
63117. Morii, H., Ogawa, M., Fukuda, K., Taniguchi, H. & Koga, Y. A revised biosynthetic pathway for  
632 phosphatidylinositol in *Mycobacteria*. *J. Biochem.* **148**, 593–602 (2010).
63318. Belcher Dufresne, M. *et al.* Structural and Functional Characterization of Phosphatidylinositol-Phosphate  
634 Biosynthesis in *Mycobacteria*. *J. Mol. Biol.* **432**, 5137–5151 (2020).
63519. Harrison, P. J., Dunn, T. M. & Campopiano, D. J. Sphingolipid biosynthesis in man and microbes. *Nat. Prod. Rep.*  
636 (2018) doi:10.1039/c8np00019k.
63720. Koropatkin, N. M., Martens, E. C., Gordon, J. I. & Smith, T. J. Starch catabolism by a prominent human gut  
638 symbiont is directed by the recognition of amylose helices. *Structure* **16**, 1105–1115 (2008).
63921. Xu, J. *et al.* A genomic view of the human-*Bacteroides thetaiotaomicron* symbiosis. *Science* **299**, 2074–2076  
640 (2003).
64122. Clarke, O. B. *et al.* Structural basis for phosphatidylinositol-phosphate biosynthesis. *Nat. Commun.* **6**, 8505  
642 (2015).
64323. Ryan, D., Jenniches, L., Reichardt, S., Barquist, L. & Westermann, A. J. A high-resolution transcriptome map  
644 identifies small RNA regulation of metabolism in the gut microbe *Bacteroides thetaiotaomicron*. *Nat. Commun.*  
645 **11**, 593 (2020).
64624. Kolly, G. S. *et al.* GtrA Protein Rv3789 Is Required for Arabinosylation of Arabinogalactan in *Mycobacterium*  
647 tuberculosis. *J. Bacteriol.* **197**, 3686–3697 (2015).
64825. Fukao, M. *et al.* Plasmid-encoded glycosyltransferase operon is responsible for exopolysaccharide production,  
649 cell aggregation, and bile resistance in a probiotic strain, *Lactobacillus brevis* KB290. *J. Biosci. Bioeng.* **128**, 391–  
650 397 (2019).

65126. Mayer, M. J., D'Amato, A., Colquhoun, I. J., Le Gall, G. & Narbad, A. Identification of Genes Required for Glucan  
652 Exopolysaccharide Production in *Lactobacillus johnsonii* Suggests a Novel Biosynthesis Mechanism. *Appl.*  
653 *Environ. Microbiol.* **86**, (2020).
65427. Lim, B., Zimmermann, M., Barry, N. A. & Goodman, A. L. Engineered Regulatory Systems Modulate Gene  
655 Expression of Human Commensals in the Gut. *Cell* **169**, 547–558.e15 (2017).
65628. Barnett, J. E., Brice, R. E. & Corina, D. L. A colorimetric determination of inositol monophosphates as an assay  
657 for D-glucose 6-phosphate-1L-myoinositol 1-phosphate cyclase. *Biochem. J* **119**, 183–186 (1970).
65829. Chatterjee, A., Majee, M., Ghosh, S. & Majumder, A. L. sll1722, an unassigned open reading frame of  
659 *Synechocystis* PCC 6803, codes for L-myo-inositol 1-phosphate synthase. *Planta* **218**, 989–998 (2004).
66030. Donahue, T. F. & Henry, S. A. myo-Inositol-1-phosphate synthase. Characteristics of the enzyme and  
661 identification of its structural gene in yeast. *J. Biol. Chem.* **256**, 7077–7085 (1981).
66231. Chen, L., Zhou, C., Yang, H. & Roberts, M. F. Inositol-1-phosphate synthase from *Archaeoglobus fulgidus* is a  
663 class II aldolase. *Biochemistry* **39**, 12415–12423 (2000).
66432. Donahue, J. L. *et al.* The *Arabidopsis thaliana* Myo-inositol 1-phosphate synthase1 gene is required for Myo-  
665 inositol synthesis and suppression of cell death. *Plant Cell* **22**, 888–903 (2010).
66633. Norman, R. A. *et al.* Crystal structure of inositol 1-phosphate synthase from *Mycobacterium tuberculosis*, a key  
667 enzyme in phosphatidylinositol synthesis. *Structure* **10**, 393–402 (2002).
66834. Jin, X. & Geiger, J. H. Structures of NAD<sup>+</sup>- and NADH-bound 1-L-myo-inositol 1-phosphate synthase. *Acta*  
669 *Crystallogr. D Biol. Crystallogr.* **59**, 1154–1164 (2003).
67035. Stieglitz, K. A., Yang, H., Roberts, M. F. & Stec, B. Reaching for mechanistic consensus across life kingdoms:  
671 structure and insights into catalysis of the myo-inositol-1-phosphate synthase (mIPS) from *Archaeoglobus*  
672 *fulgidus*. *Biochemistry* **44**, 213–224 (2005).
67336. Kudo, F., Tsunoda, T., Yamaguchi, K., Miyanaga, A. & Eguchi, T. Stereochemistry in the Reaction of the myo-  
674 Inositol Phosphate Synthase Ortholog Ari2 during Aristeromycin Biosynthesis. *Biochemistry* **58**, 5112–5116  
675 (2019).
67637. Chhetri, D. R., Adhikari, J. & Mukherjee, A. K. NAD<sup>+</sup> mediated differential thermotolerance between  
677 chloroplastic and cytosolic L-myo-inositol-1-phosphate synthase from *Diplopterygium glaucum* (Thunb.) Nakai.  
678 *Prep. Biochem. Biotechnol.* **36**, 307–319 (2006).

67988. Gronnier, J., Germain, V., Gouguet, P., Cacas, J.-L. & Mongrand, S. GIPC: Glycosyl Inositol Phospho Ceramides, the major sphingolipids on earth. *Plant Signal. Behav.* **11**, e1152438 (2016).
68139. Cerantola, V. *et al.* Aureobasidin A arrests growth of yeast cells through both ceramide intoxication and deprivation of essential inositolphosphorylceramides. *Mol. Microbiol.* **71**, 1523–1537 (2009).
68340. Porter, N. T., Canales, P., Peterson, D. A. & Martens, E. C. A Subset of Polysaccharide Capsules in the Human Symbiont *Bacteroides thetaiotaomicron* Promote Increased Competitive Fitness in the Mouse Gut. *Cell Host Microbe* **22**, 494–506.e8 (2017).
68641. Porter, N. T. *et al.* Phase-variable capsular polysaccharides and lipoproteins modify bacteriophage susceptibility in *Bacteroides thetaiotaomicron*. *Nature Microbiology* (2020) doi:10.1038/s41564-020-0746-5.
68842. Stankeviciute, G., Guan, Z., Goldfine, H. & Klein, E. A. *Caulobacter crescentus* Adapts to Phosphate Starvation by Synthesizing Anionic Glycoglycerolipids and a Novel Glycosphingolipid. *MBio* **10**, (2019).
69043. Stentz, R. *et al.* A bacterial homolog of a eukaryotic inositol phosphate signaling enzyme mediates cross-kingdom dialog in the mammalian gut. *Cell Rep.* **6**, 646–656 (2014).
69244. Brito, J. A., Borges, N., Vonrhein, C., Santos, H. & Archer, M. Crystal structure of Archaeoglobus fulgidus CTP:inositol-1-phosphate cytidyltransferase, a key enzyme for di-myo-inositol-phosphate synthesis in (hyper)thermophiles. *J. Bacteriol.* **193**, 2177–2185 (2011).
69545. Huang, H. *et al.* Panoramic view of a superfamily of phosphatases through substrate profiling. *Proc. Natl. Acad. Sci. U. S. A.* **112**, E1974–83 (2015).
69746. Levine, T. P., Wiggins, C. A. & Munro, S. Inositol phosphorylceramide synthase is located in the Golgi apparatus of *Saccharomyces cerevisiae*. *Mol. Biol. Cell* **11**, 2267–2281 (2000).
69947. Blunsom, N. J. & Cockcroft, S. Phosphatidylinositol synthesis at the endoplasmic reticulum. *Biochim. Biophys. Acta Mol. Cell Biol. Lipids* **1865**, 158471 (2020).
70148. Kennedy, E. P. & Weiss, S. B. The function of cytidine coenzymes in the biosynthesis of phospholipides. *J. Biol. Chem.* **222**, 193–214 (1956).
70349. Farine, L., Niemann, M., Schneider, A. & Bütikofer, P. Phosphatidylethanolamine and phosphatidylcholine biosynthesis by the Kennedy pathway occurs at different sites in *Trypanosoma brucei*. *Sci. Rep.* **5**, 16787 (2015).
70550. Olsen, I. & Nichols, F. C. Are Sphingolipids and Serine Dipeptide Lipids Underestimated Virulence Factors of *Porphyromonas gingivalis*? *Infect. Immun.* **86**, (2018).

70751. An, D. *et al.* Sphingolipids from a symbiotic microbe regulate homeostasis of host intestinal natural killer T cells.  
708 *Cell* **156**, 123–133 (2014).
70952. Wieland Brown, L. C. *et al.* Production of  $\alpha$ -galactosylceramide by a prominent member of the human gut  
710 microbiota. *PLoS Biol.* **11**, e1001610 (2013).
71153. Heaver, S. L., Johnson, E. L. & Ley, R. E. Sphingolipids in host-microbial interactions. *Curr. Opin. Microbiol.* **43**,  
712 92–99 (2018).
71354. Johnson, E. L. *et al.* Sphingolipids produced by gut bacteria enter host metabolic pathways impacting ceramide  
714 levels. *Nat. Commun.* **11**, 2471 (2020).
71555. Rocha, F. G. *et al.* Porphyromonas gingivalis Sphingolipid Synthesis Limits the Host Inflammatory Response. *J.*  
716 *Dent. Res.* 22034520908784 (2020) doi:10.1177/0022034520908784.
71756. Wu, S.-E. *et al.* Microbiota-derived metabolite promotes HDAC3 activity in the gut. *Nature* (2020)  
718 doi:10.1038/s41586-020-2604-2.
71957. Mücksch, F. *et al.* Quantification of phosphoinositides reveals strong enrichment of PIP2 in HIV-1 compared to  
720 producer cell membranes. *Sci. Rep.* **9**, 17661 (2019).
72158. Ledvina, H. E. *et al.* A Phosphatidylinositol 3-Kinase Effector Alters Phagosomal Maturation to Promote  
722 Intracellular Growth of Francisella. *Cell Host Microbe* **24**, 285–295.e8 (2018).
72359. Kraal, L., Abubucker, S., Kota, K., Fischbach, M. A. & Mitreva, M. The prevalence of species and strains in the  
724 human microbiome: a resource for experimental efforts. *PLoS One* **9**, e97279 (2014).
72560. Gråve, K., Bennett, M. D. & Högbom, M. Structure of Mycobacterium tuberculosis phosphatidylinositol  
726 phosphate synthase reveals mechanism of substrate binding and metal catalysis. *Commun Biol* **2**, 175 (2019).
72761. Folch, J., Lees, M. & Sloane Stanley, G. H. A simple method for the isolation and purification of total lipides  
728 from animal tissues. *J. Biol. Chem.* **226**, 497–509 (1957).
72962. Bui, H. H. *et al.* Direct analysis of PI(3,4,5)P3 using liquid chromatography electrospray ionization tandem mass  
730 spectrometry. *Anal. Biochem.* **547**, 66–76 (2018).
73163. Winter, G. xia2: an expert system for macromolecular crystallography data reduction. *J. Appl. Crystallogr.* **43**,  
732 186–190 (2009).
73364. Winter, G. *et al.* DIALS: implementation and evaluation of a new integration package. *Acta Crystallogr D Struct*  
734 *Biol* **74**, 85–97 (2018).



73565. Evans, P. R. An introduction to data reduction: space-group determination, scaling and intensity statistics. *Acta Crystallogr. D Biol. Crystallogr.* **67**, 282–292 (2011).
73766. McCoy, A. J. *et al.* Phaser crystallographic software. *J. Appl. Crystallogr.* **40**, 658–674 (2007).
73867. Murshudov, G. N. *et al.* REFMAC5 for the refinement of macromolecular crystal structures. *Acta Crystallogr. D Biol. Crystallogr.* **67**, 355–367 (2011).
74068. Emsley, P., Lohkamp, B., Scott, W. G. & Cowtan, K. Features and development of Coot. *Acta Crystallogr. D Biol. Crystallogr.* **66**, 486–501 (2010).
74269. Williams, C. J. *et al.* MolProbity: More and better reference data for improved all-atom structure validation. *Protein Sci.* **27**, 293–315 (2018).
74470. Krissinel, E., Uski, V., Lebedev, A., Winn, M. & Ballard, C. Distributed computing for macromolecular crystallography. *Acta Crystallogr D Struct Biol* **74**, 143–151 (2018).
74671. Pettersen, E. F. *et al.* UCSF ChimeraX: Structure visualization for researchers, educators, and developers. *Protein Sci.* **30**, 70–82 (2021).
74872. Andrews, S. *et al.* FastQC. (2012).
74973. Cunningham, F. *et al.* Ensembl 2019. *Nucleic Acids Res.* **47**, D745–D751 (2019).
75074. Langmead, B. & Salzberg, S. L. Fast gapped-read alignment with Bowtie 2. *Nat. Methods* **9**, 357–359 (2012).
75175. Anders, S., Pyl, P. T. & Huber, W. HTSeq—a Python framework to work with high-throughput sequencing data. *Bioinformatics* **31**, 166–169 (2015).
75376. Robinson, M. D., McCarthy, D. J. & Smyth, G. K. edgeR: a Bioconductor package for differential expression analysis of digital gene expression data. *Bioinformatics* **26**, 139–140 (2010).
75577. Ritchie, M. E. *et al.* limma powers differential expression analyses for RNA-sequencing and microarray studies. *Nucleic Acids Res.* **43**, e47 (2015).
75778. Camacho, C. *et al.* BLAST+: architecture and applications. *BMC Bioinformatics* **10**, 421 (2009).
75879. Parte, A. C. LPSN - List of Prokaryotic names with Standing in Nomenclature (bacterio.net), 20 years on. *Int. J. Syst. Evol. Microbiol.* **68**, 1825–1829 (2018).
76080. Murat Eren, A. *et al.* Anvi'o: an advanced analysis and visualization platform for 'omics data. *PeerJ* **3**, e1319 (2015).
76281. Edgar, R. C. MUSCLE: multiple sequence alignment with high accuracy and high throughput. *Nucleic Acids Res.* **32**, 1792–1797 (2004).

76482. Stamatakis, A. RAxML version 8: a tool for phylogenetic analysis and post-analysis of large phylogenies.

765 *Bioinformatics* **30**, 1312–1313 (2014).

766

## Supplementary Figures

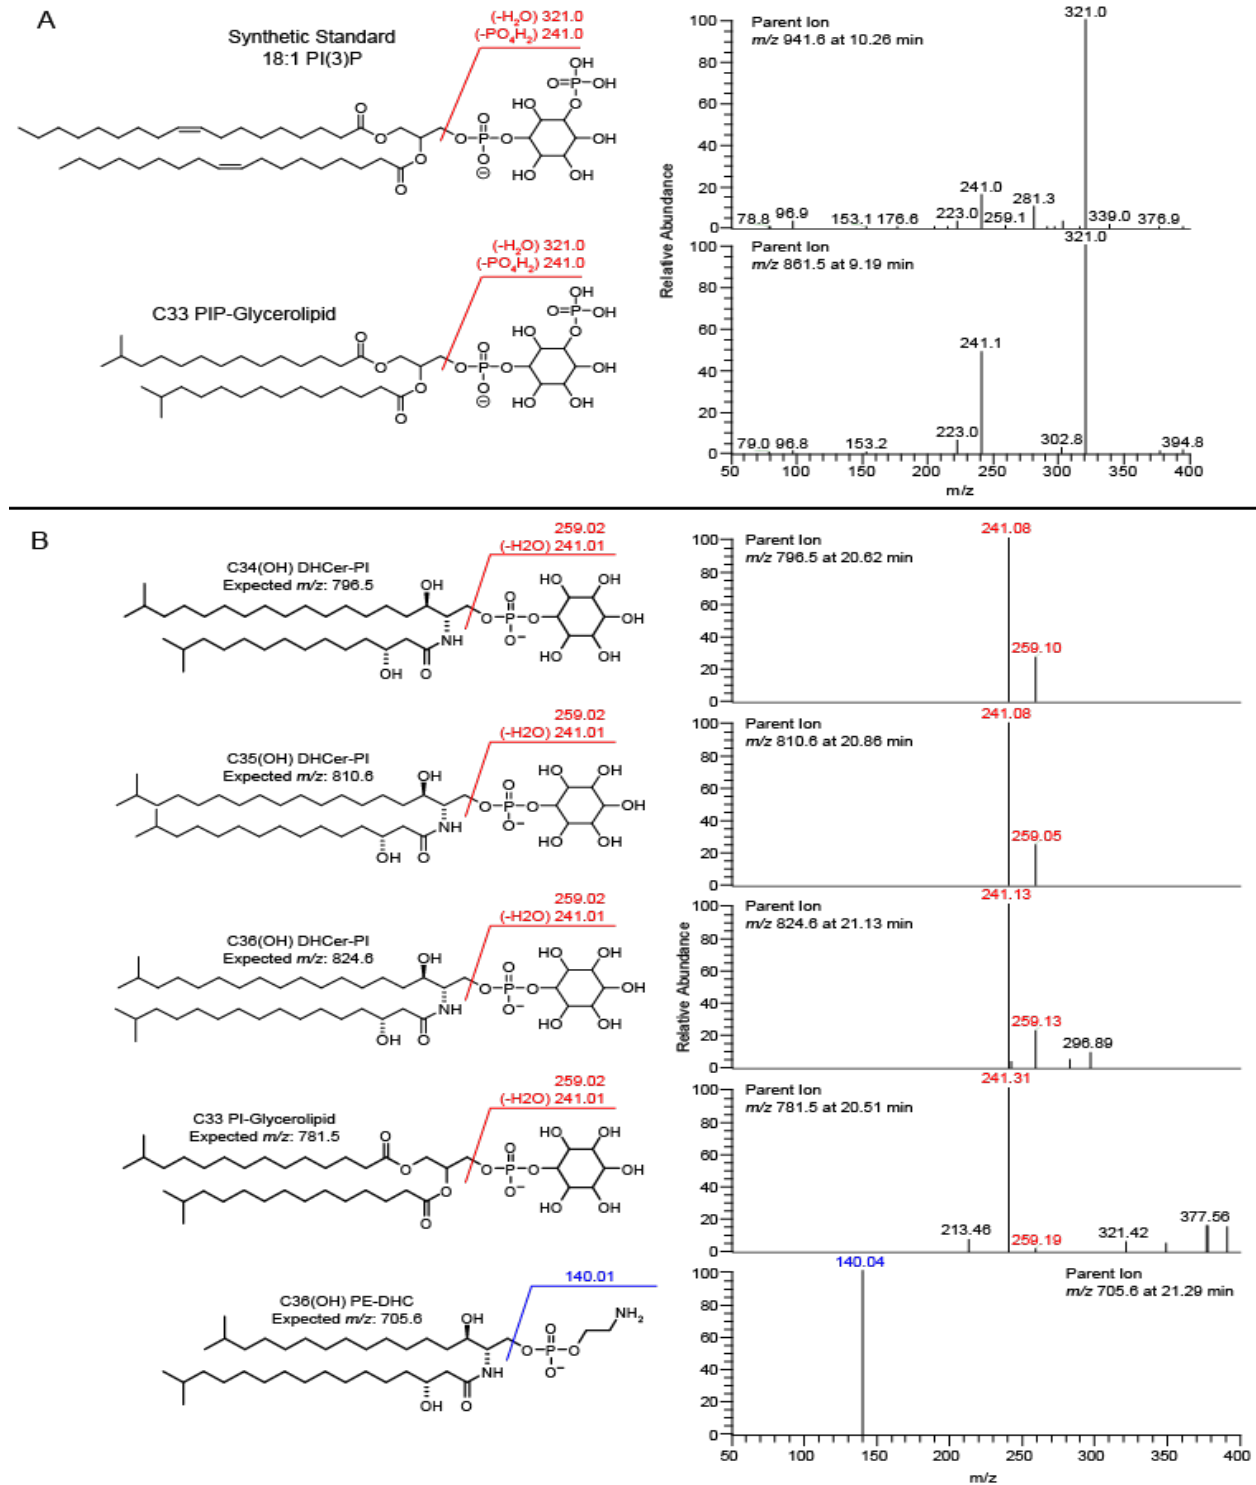

**Supplementary Figure 1. Lipid structures and fragmentation patterns of BT inositol and ethanolamine lipids** (A) Comparison of LC-MS/MS fragmentation patterns of BT-derived PIP with the synthetic standard, 18:1 PI(3)P. (B) LC-MS/MS fragmentation patterns of lipid structures present in iSPT BT at 100 ng/mL aTC induction, including PI-DHC lipids (C34(OH)DHCer-PI, C35(OH)DHCer-PI, C36(OH)DHCer-PI), C33 PI-glycerolipid, and C36(OH) PE-DHC. Loss of the phosphoinositol head group is indicated at mass 259. Fragments characteristic for lipids with phosphoinositol-based headgroups are in red; those for phosphoethanolamine-based headgroups are in blue.

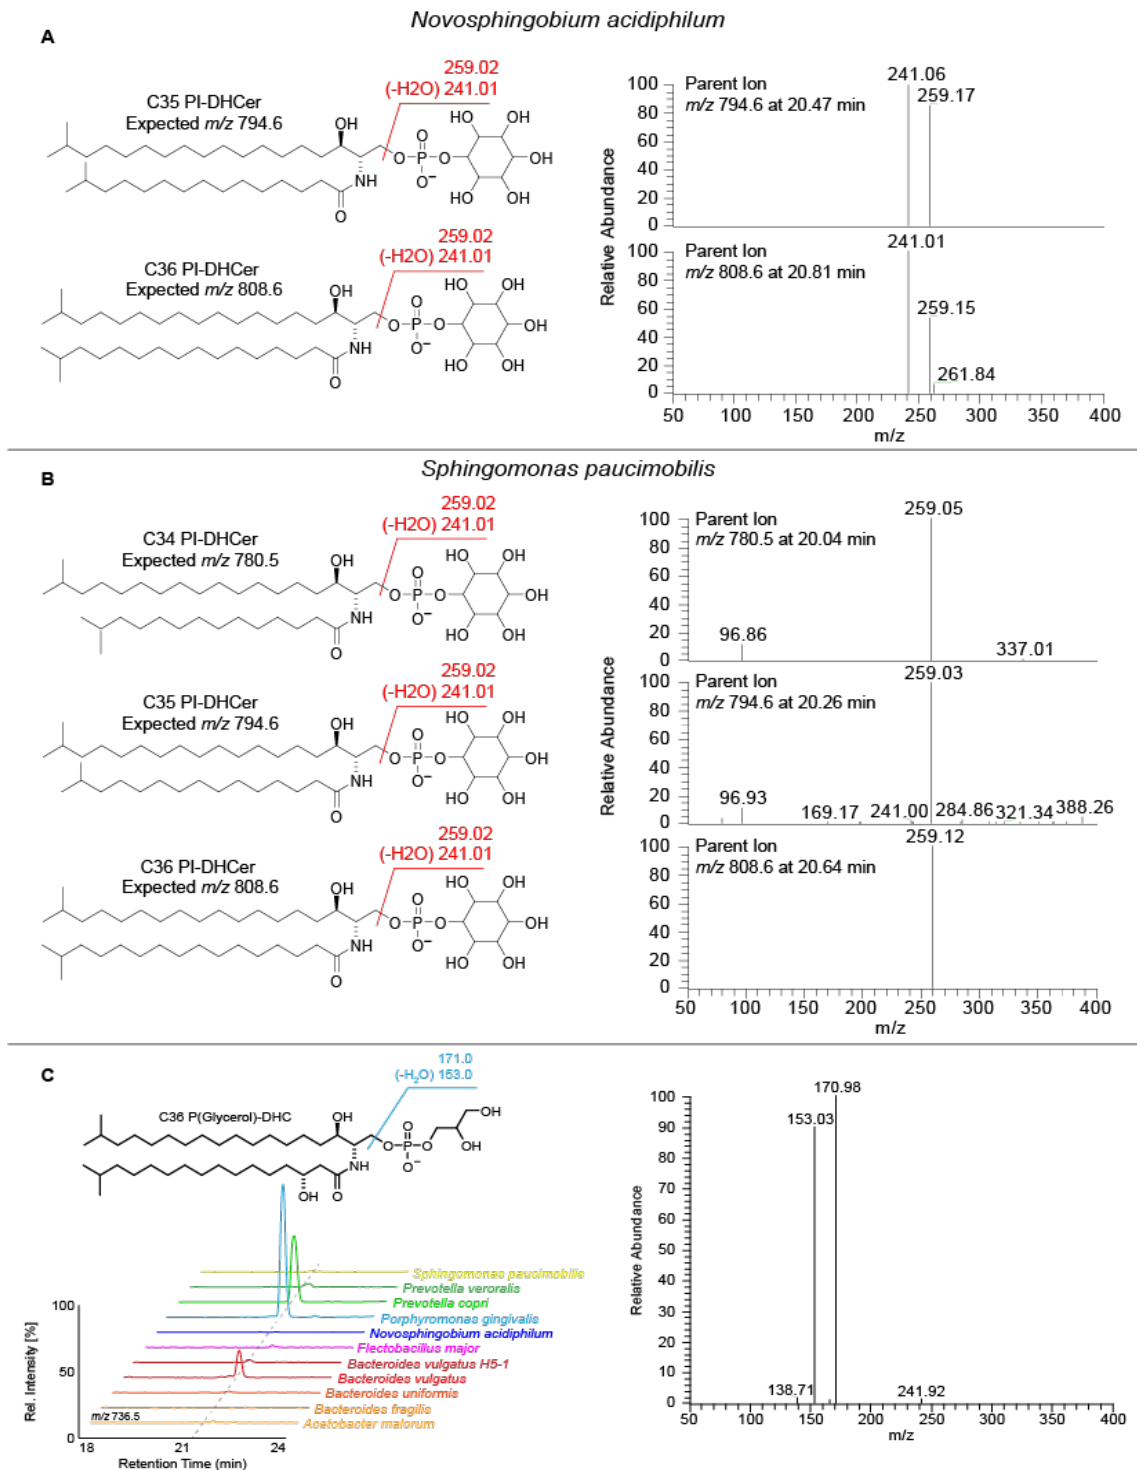

**Supplementary Figure 2. Inositol-like lipid structures in diverse sphingolipid-producing species (A)** LC-MS/MS fragmentation patterns of lipids extracted from *Novosphingobium acidiphilum* consistent with the synthesis of C35 and C36 PI-DHC. (B) LC-MS/MS fragmentation pattern of lipids extracted from *Sphingomonas paucimobilis*, demonstrating the presence of a headgroup with the same mass as inositol phosphate (259) but lacking the characteristic fragment of this group (241). (C) LC-MS/MS spectra and fragmentation pattern of a C36 P(Glycerol)-DHC structure present in *Prevotella copri*, *Porphyromonas gingivalis*, and *Bacteroides vulgatus*.

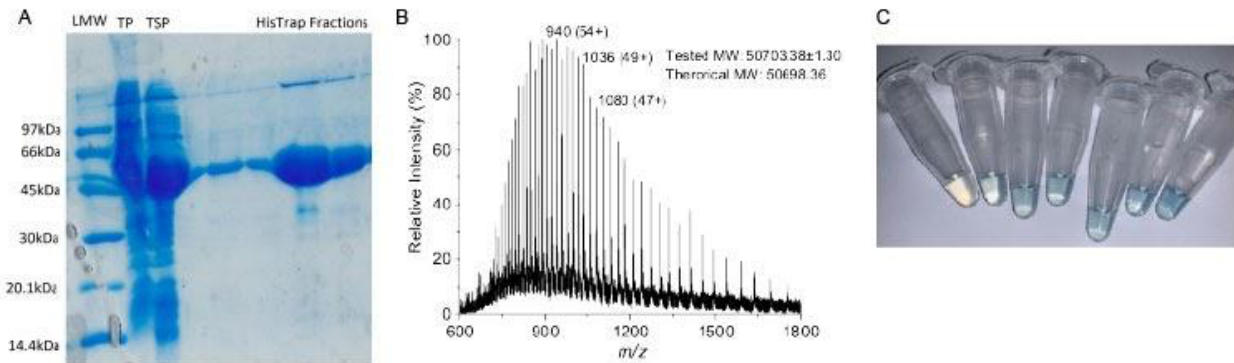

**Supplementary Figure 3. Purification of BT\_1526** (A) Expression and purification of recombinant BT\_1526 MIPS purified from *E. coli*. The SDS-PAGE analysis shows the purity of the samples isolated by immobilised metal affinity chromatography (IMAC). The band between the 66k and 45 kDa corresponds to BT\_1526 MIPS. (B) Electrospray ionisation mass spectrometry (ESI-MS) analysis of the purified BT\_1526 MIPS. Positive mode ion envelope with charge states annotated on particular masses. The predicted molecular weight matches well with the theoretical mass without the initial Met residue. (C) Typical colour observed with the molybdenum blue assay of MIPS activity at 820 nm.

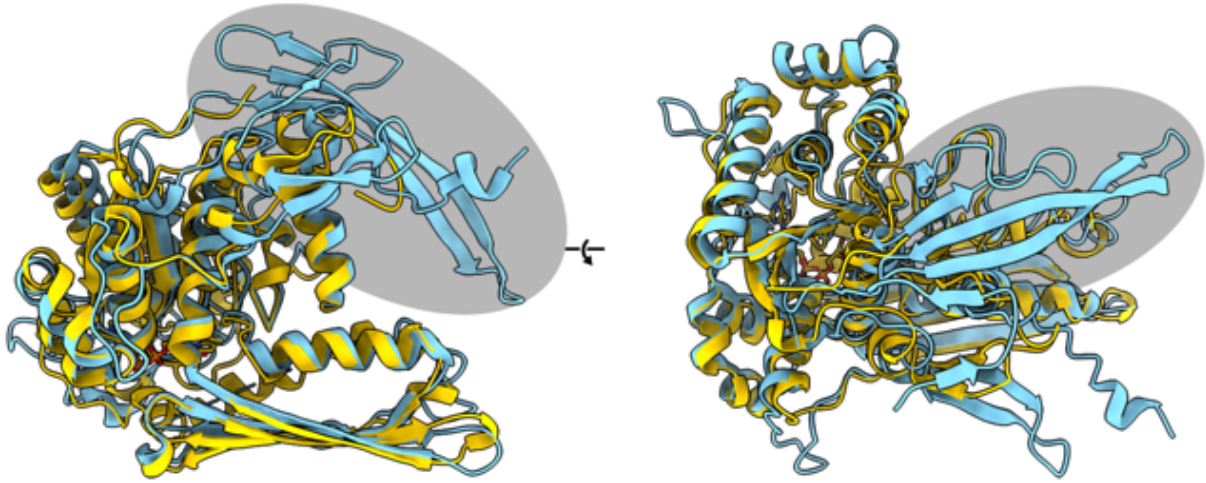

**Supplementary Figure 4. Structural comparison of prokaryotic and eukaryotic MIPS proteins.**

Secondary structure alignment of MIPS BT\_1526 (in yellow) and *Saccharomyces cerevisiae* MIPS (PDBID: 1P1i) (in cyan). The N-terminal extension present in eukaryotic MIPS structures is highlighted with a grey oval.

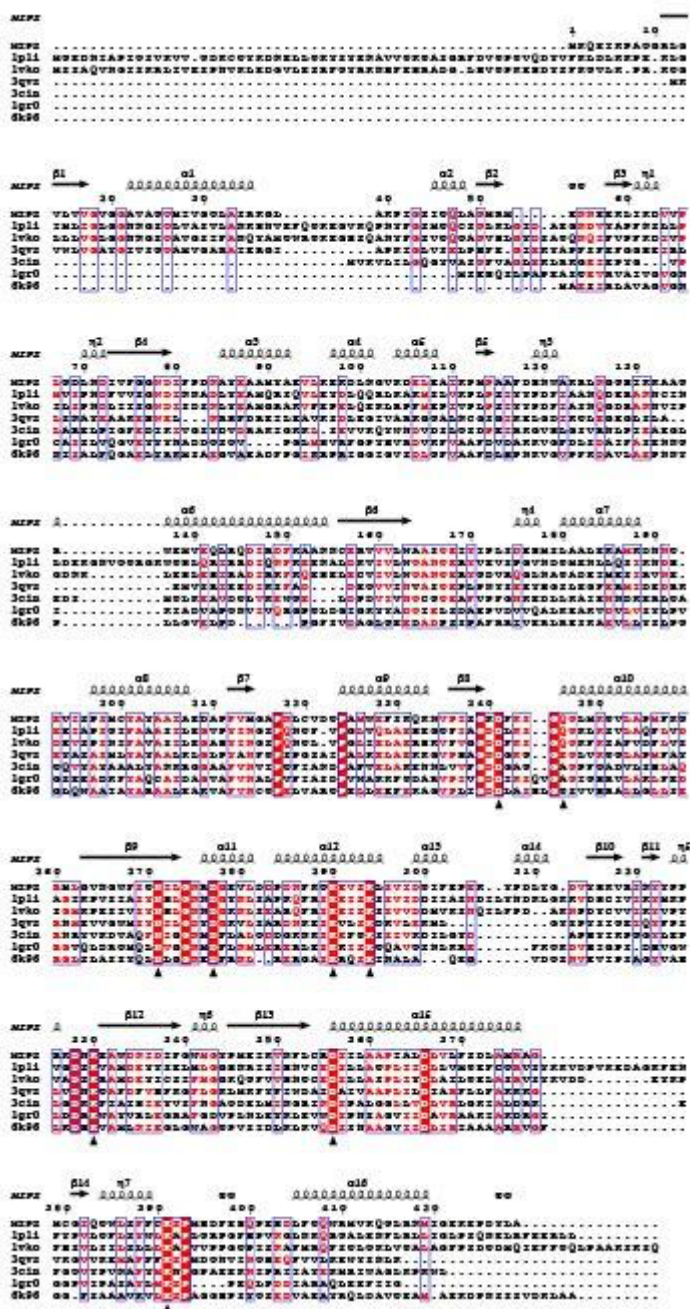

**Supplementary Figure 5. MIPS structure and sequence comparison with active site residues.** The sequences are: MIPS (BT\_1526), 1p1i (*Saccharomyces cerevisiae*), 1vko (*Caenorhabditis elegans*), 3qvs (*Archaeoglobus fulgidus*), 3cin (*Thermotoga maritima* MSB8), 1gr0 (*Mycobacterium tuberculosis*) and 6k96 (*Streptomyces citricolor* Ari2). Secondary structural elements are annotated, active site residues are marked with an arrow and conserved residues marked with red shading (fully conserved) or pink shading (similar).

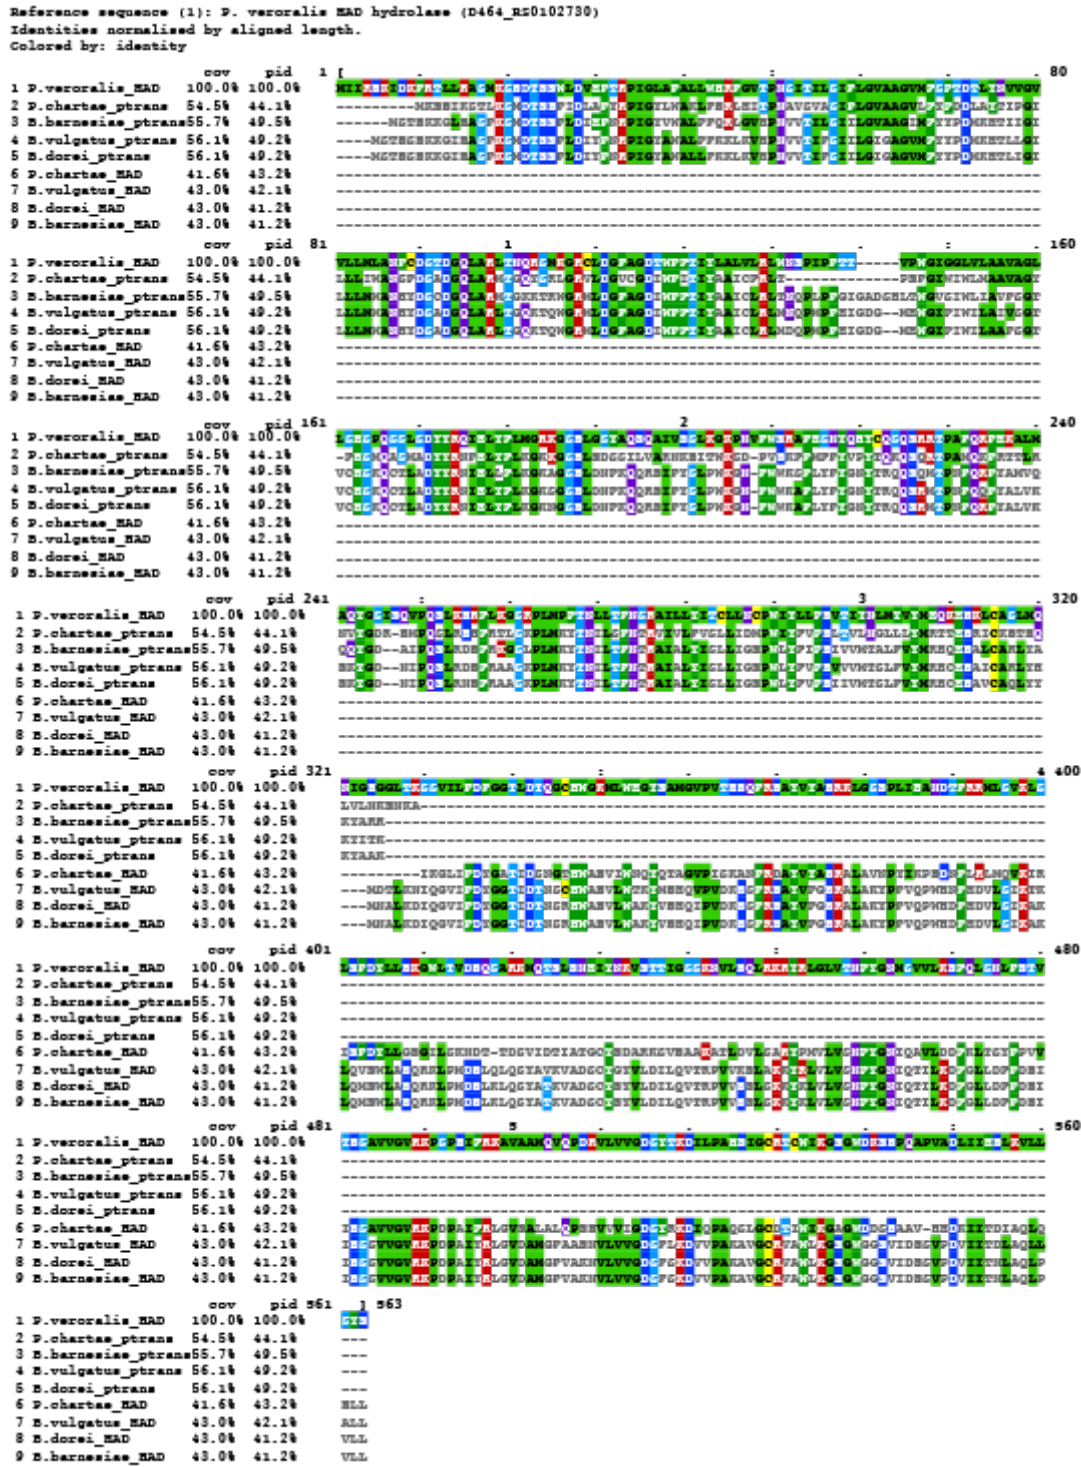

**Supplementary Figure 6. Multiple sequence alignment of predicted proteins with putative involvement in an alternative inositol lipid metabolism cluster.** Amino acid sequences from representative species containing the putative alternative inositol lipid metabolism cluster (*Parabacteroides chartae*, *Bacteroides barnesiae*, *Bacteroides vulgatus*, and *Bacteroides dorei*) HAD hydrolase and CDP-alcohol phosphatidyltransferase, aligned to the *Prevotella veroralis* predicted fusion protein with homology to both of these proteins (D464\_RS0102730). Alignment was performed using Clustal Omega with visualization by MView.



## **Supplementary Tables**

**Supplementary Table 1:** BT\_1526 (MIPS) X-ray data collection and refinement statistics.

**Supplementary Table 2:** Top differentially expressed genes in wild-type *B. theta* compared to the WTΔBT\_1522 strain in minimal medium with > 1.5 log<sub>2</sub>FC. Adjusted-P-value is Benjamini-Hochberg corrected.

**Supplementary Table 3:** Top differentially expressed genes in the iSPT strain compared to the ΔBT\_1526 strain, both at 100 ng/mL aTC induction in minimal medium, with > 1.5 log<sub>2</sub>FC. Adjusted-P-value is Benjamini-Hochberg corrected. “CPS” column indicates the capsular polysaccharide synthesis (CPS) locus to which the gene belongs, when applicable.

**Supplementary Table 4:** E-values of BLAST-P homology to the *B. thetaiotaomicron* inositol lipid cluster, or the putative alternative pathway (using *B. vulgatus* sequences: phosphatidyltransferase BVU\_RS13105, HAD hydrolase BVU\_RS13115, NTP transferase BVU\_RS13095).

**Supplementary Table 5:** Strains and plasmids used in this study; primers used in the amplification of genomic regions prior to plasmid assembly via restriction digest or Gibson cloning; TetR cassette components, insertion locations, primers, and gene fragment for the generation of the inducible SPT BT strain. Components and assembly were inspired by Lim et al. 2017.

**Supplementary Table 6:** Quantification of inositol in surface polysaccharides (raw values).

**Supplementary Table 7:** Kinetic data of BT\_1526 MIPS (raw values).
